# Supplementary material for: TFCat: the curated catalog of mouse and human transcription factors
Source: PubMed Central journal article supplement (PMC2691000; doi:10.1186/gb-2009-10-3-r29), 2009-03-12

## Additional Data File 1: Tables

**Table S1.** Quality assurance gene annotation judgment summary

|                       | <b>Gene Annotation Pairs</b> |
|-----------------------|------------------------------|
| Concordant Judgments  | 37                           |
| Discordant Judgments  | 13                           |
| # QA Gene Annotations | 50                           |

**Table S2.** Quality assurance gene annotation pair judgments

| Gene ID | Description                                                  | Reviewer                | Judgment          |
|---------|--------------------------------------------------------------|-------------------------|-------------------|
| 12022   | BarH-like homeobox 1                                         | Jared Roach             | TF Gene Candidate |
| 12022   | BarH-like homeobox 1                                         | Elodie Portales-Casamar | TF Gene Candidate |
| 12455   | cyclin T1                                                    | Jared Roach             | Not a TF          |
| 12455   | cyclin T1                                                    | Debra Fulton            | TF Gene Candidate |
| 12590   | caudal type homeo box 1                                      | Sarav Sundararajan      | TF Gene           |
| 12590   | caudal type homeo box 1                                      | Rob Sladek              | TF Gene           |
| 14247   | Friend leukemia integration 1                                | Gwenael Breard          | TF Gene           |
| 14247   | Friend leukemia integration 1                                | Elodie Portales-Casamar | TF Gene           |
| 15375   | forkhead box A1                                              | Gwenael Breard          | TF Gene           |
| 15375   | forkhead box A1                                              | Rob Sladek              | TF Gene           |
| 15384   | heterogeneous nuclear ribonucleoprotein A/B                  | Sarav Sundararajan      | TF Gene           |
| 15384   | heterogeneous nuclear ribonucleoprotein A/B                  | Rob Sladek              | TF Gene           |
| 16917   | LIM homeobox transcription factor 1 beta                     | Jared Roach             | TF Gene           |
| 16917   | LIM homeobox transcription factor 1 beta                     | Wyeth Wasserman         | TF Gene Candidate |
| 17300   | forkhead box C1                                              | Jared Roach             | TF Gene           |
| 17300   | forkhead box C1                                              | Elodie Portales-Casamar | TF Gene           |
| 17702   | homeo box, msh-like 2                                        | Wyeth Wasserman         | TF Gene           |
| 17702   | homeo box, msh-like 2                                        | Shannan HoSui           | TF Gene           |
| 18504   | paired box gene 2                                            | Jared Roach             | TF Gene           |
| 18504   | paired box gene 2                                            | Shannan HoSui           | TF Gene           |
| 18508   | paired box gene 6                                            | Jared Roach             | TF Gene           |
| 18508   | paired box gene 6                                            | Tim Hughes              | TF Gene           |
| 18854   | promyelocytic leukemia                                       | Jared Roach             | TF Gene Candidate |
| 18854   | promyelocytic leukemia                                       | Elodie Portales-Casamar | Not a TF          |
| 19013   | peroxisome proliferator activated receptor alpha             | Gwenael Breard          | TF Gene           |
| 19013   | peroxisome proliferator activated receptor alpha             | Sarav Sundararajan      | TF Gene           |
| 19698   | avian reticuloendotheliosis viral (v-rel) oncogene related B | Jared Roach             | TF Gene           |
| 19698   | avian reticuloendotheliosis viral (v-rel) oncogene related B | Wyeth Wasserman         | TF Gene           |
| 19708   | D4, zinc and double PHD fingers family 2                     | Rob Sladek              | Indeterminate     |
| 19708   | D4, zinc and double PHD fingers family 2                     | Wyeth Wasserman         | TF Gene Candidate |

**Table S2.** Quality assurance gene annotation pair judgments (continued)

| Gene ID | Description                                                                                       | Reviewer                | Judgment             |
|---------|---------------------------------------------------------------------------------------------------|-------------------------|----------------------|
| 20182   | retinoid X receptor beta                                                                          | Andrew Kwon             | TF Gene              |
| 20182   | retinoid X receptor beta                                                                          | David Martin            | TF Gene Candidate    |
| 20466   | transcriptional regulator, SIN3A (yeast)                                                          | Gwenael Breard          | TF Gene Candidate    |
| 20466   | transcriptional regulator, SIN3A (yeast)                                                          | Debra Fulton            | TF Gene              |
| 20588   | SWI/SNF related, matrix associated, actin dependent regulator of chromatin, subfamily c, member 1 | David Martin            | TF Gene Candidate    |
| 20588   | SWI/SNF related, matrix associated, actin dependent regulator of chromatin, subfamily c, member 1 | Shannan HoSui           | TF Gene              |
| 20613   | snail homolog 1 (Drosophila)                                                                      | Rob Sladek              | TF Gene              |
| 20613   | snail homolog 1 (Drosophila)                                                                      | Wyeth Wasserman         | TF Gene Candidate    |
| 20630   | U1 small nuclear ribonucleoprotein 1C                                                             | Jared Roach             | Not a TF             |
| 20630   | U1 small nuclear ribonucleoprotein 1C                                                             | Shannan HoSui           | TF Evidence Conflict |
| 20669   | SRY-box containing gene 14                                                                        | Wyeth Wasserman         | TF Gene Candidate    |
| 20669   | SRY-box containing gene 14                                                                        | Mark Minie              | TF Gene Candidate    |
| 20671   | SRY-box containing gene 17                                                                        | Wyeth Wasserman         | TF Gene Candidate    |
| 20671   | SRY-box containing gene 17                                                                        | Elodie Portales-Casamar | TF Gene              |
| 21339   | TATA box binding protein (Tbp)-associated factor, RNA polymerase I, A                             | Sarav Sundararajan      | Not a TF             |
| 21339   | TATA box binding protein (Tbp)-associated factor, RNA polymerase I, A                             | Debra Fulton            | TF Gene              |
| 21387   | T-box 4                                                                                           | Sarav Sundararajan      | TF Gene Candidate    |
| 21387   | T-box 4                                                                                           | Rob Sladek              | Indeterminate        |
| 21416   | transcription factor 7-like 2, T-cell specific, HMG-box                                           | David Martin            | TF Gene              |
| 21416   | transcription factor 7-like 2, T-cell specific, HMG-box                                           | Andrew Kwon             | TF Gene              |
| 21685   | thyrotroph embryonic factor                                                                       | Gwenael Breard          | TF Gene              |
| 21685   | thyrotroph embryonic factor                                                                       | Debra Fulton            | TF Gene              |
| 21833   | thyroid hormone receptor alpha                                                                    | Jared Roach             | TF Gene              |
| 21833   | thyroid hormone receptor alpha                                                                    | Debra Fulton            | TF Gene              |
| 22032   | Tnf receptor associated factor 4                                                                  | Debra Fulton            | TF Gene              |
| 22032   | Tnf receptor associated factor 4                                                                  | David Martin            | Indeterminate        |
| 22608   | Y box protein 1                                                                                   | Wyeth Wasserman         | TF Gene              |
| 22608   | Y box protein 1                                                                                   | David Martin            | TF Gene              |

**Table S2.** Quality assurance gene annotation pair judgments (continued)

| Gene ID | Description                                                                                       | Reviewer                | Judgment          |
|---------|---------------------------------------------------------------------------------------------------|-------------------------|-------------------|
| 22634   | pleiomorphic adenoma gene-like 1                                                                  | Jared Roach             | TF Gene           |
| 22634   | pleiomorphic adenoma gene-like 1                                                                  | Debra Fulton            | TF Gene           |
| 22666   | zinc finger protein 161                                                                           | Sarav Sundararajan      | TF Gene           |
| 22666   | zinc finger protein 161                                                                           | Wyeth Wasserman         | TF Gene           |
| 22718   | zinc finger protein 60                                                                            | Rob Sladek              | TF Gene Candidate |
| 22718   | zinc finger protein 60                                                                            | Tim Hughes              | TF Gene Candidate |
| 22722   | zinc finger protein 64                                                                            | Wyeth Wasserman         | TF Gene Candidate |
| 22722   | zinc finger protein 64                                                                            | Elodie Portales-Casamar | Indeterminate     |
| 56233   | histone deacetylase 7A                                                                            | Wyeth Wasserman         | TF Gene Candidate |
| 56233   | histone deacetylase 7A                                                                            | Elodie Portales-Casamar | TF Gene           |
| 56309   | c-myc binding protein                                                                             | Sarav Sundararajan      | Probably Not a TF |
| 56309   | c-myc binding protein                                                                             | Rob Sladek              | TF Gene Candidate |
| 65100   | zinc finger protein of the cerebellum 5                                                           | Gwenael Breard          | TF Gene Candidate |
| 65100   | zinc finger protein of the cerebellum 5                                                           | Wyeth Wasserman         | TF Gene           |
| 69792   | mediator of RNA polymerase II transcription, subunit 6 homolog (yeast)                            | Sarav Sundararajan      | Not a TF          |
| 69792   | mediator of RNA polymerase II transcription, subunit 6 homolog (yeast)                            | Andrew Kwon             | TF Gene Candidate |
| 71458   | Bcl6 interacting corepressor                                                                      | Shannan HoSui           | TF Gene Candidate |
| 71458   | Bcl6 interacting corepressor                                                                      | Andrew Kwon             | TF Gene Candidate |
| 71950   | Nanog homeobox                                                                                    | Rob Sladek              | TF Gene           |
| 71950   | Nanog homeobox                                                                                    | Tim Hughes              | TF Gene           |
| 75901   | MAD homolog 4 interacting transcription coactivator 1                                             | Sarav Sundararajan      | Probably Not a TF |
| 75901   | MAD homolog 4 interacting transcription coactivator 1                                             | Rob Sladek              | TF Gene Candidate |
| 83796   | SWI/SNF related, matrix associated, actin dependent regulator of chromatin, subfamily d, member 2 | Debra Fulton            | TF Gene Candidate |
| 83796   | SWI/SNF related, matrix associated, actin dependent regulator of chromatin, subfamily d, member 2 | Wyeth Wasserman         | TF Gene Candidate |
| 94222   | oligodendrocyte transcription factor 3                                                            | Rob Sladek              | Indeterminate     |
| 94222   | oligodendrocyte transcription factor 3                                                            | Tim Hughes              | TF Gene Candidate |
| 94353   | high mobility group nucleosomal binding domain 3                                                  | Jared Roach             | TF Gene Candidate |
| 94353   | high mobility group nucleosomal binding domain 3                                                  | Rob Sladek              | TF Gene           |

**Table S2.** Quality assurance gene annotation pair judgments (continued)

| <b>Gene ID</b> | <b>Description</b>                                   | <b>Reviewer</b>    | <b>Judgment</b>   |
|----------------|------------------------------------------------------|--------------------|-------------------|
| 110805         | forkhead box E1 (thyroid transcription factor 2)     | Wyeth Wasserman    | TF Gene Candidate |
| 110805         | forkhead box E1 (thyroid transcription factor 2)     | David Martin       | TF Gene Candidate |
| 114142         | forkhead box P2                                      | Rob Sladek         | TF Gene           |
| 114142         | forkhead box P2                                      | Tim Hughes         | TF Gene           |
| 114741         | suppressor of Ty 16 homolog ( <i>S. cerevisiae</i> ) | Jared Roach        | Not a TF          |
| 114741         | suppressor of Ty 16 homolog ( <i>S. cerevisiae</i> ) | Tim Hughes         | TF Gene           |
| 209448         | homeo box C10                                        | Jared Roach        | TF Gene           |
| 209448         | homeo box C10                                        | Rob Sladek         | TF Gene           |
| 216285         | cartilage homeo protein 1                            | Rob Sladek         | TF Gene           |
| 216285         | cartilage homeo protein 1                            | Tim Hughes         | TF Gene           |
| 223922         | activating transcription factor 7                    | Gwenael Breard     | TF Gene           |
| 223922         | activating transcription factor 7                    | Sarav Sundararajan | TF Gene           |
| 246086         | one cut domain, family member 3                      | David Martin       | TF Gene Candidate |
| 246086         | one cut domain, family member 3                      | Alice Chou         | TF Gene Candidate |

**Table S3.** Summary of independent annotations of TFs when the same PubMed evidence was used

| Gene ID | Gene Symbol | Description                                                                                       | Reviewer           | PubMed ID | Judgment          | Taxa                                                                               |
|---------|-------------|---------------------------------------------------------------------------------------------------|--------------------|-----------|-------------------|------------------------------------------------------------------------------------|
| 18021   | Nfatc3      | nuclear factor of activated T-cells, cytoplasmic, calcineurin-dependent 3                         | Sarav Sundararajan | 7650004   | TF Gene           | DNA-Binding: sequence-specific                                                     |
| 18021   | Nfatc3      | nuclear factor of activated T-cells, cytoplasmic, calcineurin-dependent 3                         | Amy Ticoll         | 7650004   | TF Gene           | DNA-Binding: sequence-specific                                                     |
| 18021   | Nfatc3      | nuclear factor of activated T-cells, cytoplasmic, calcineurin-dependent 3                         | Stuart Lithwick    | 7650004   | TF Gene           | DNA-Binding: sequence-specific                                                     |
| 15404   | Hoxa7       | homeo box A7                                                                                      | Sarav Sundararajan | 7911971   | TF Gene           | DNA-Binding: sequence-specific                                                     |
| 15407   | Hoxb1       | homeo box B1                                                                                      | David Martin       | 7911971   | TF Gene           | DNA-Binding: sequence-specific                                                     |
| 19883   | Rora        | RAR-related orphan receptor alpha                                                                 | Jared Roach        | 7926749   | TF Gene           | DNA-Binding: sequence-specific                                                     |
| 19883   | Rora        | RAR-related orphan receptor alpha                                                                 | Sarav Sundararajan | 7926749   | TF Gene           | DNA-Binding: sequence-specific                                                     |
| 19883   | Rora        | RAR-related orphan receptor alpha                                                                 | Rob Sladek         | 7926749   | TF Gene           | DNA-Binding: sequence-specific                                                     |
| 14237   | Foxd4       | forkhead box D4                                                                                   | Amy Ticoll         | 7957066   | TF Gene           | DNA-Binding: sequence-specific                                                     |
| 14241   | Foxl1       | forkhead box L1                                                                                   | Jaspar Database    | 7957066   | TF Gene           | DNA-Binding: sequence-specific                                                     |
| 21815   | Tgif1       | TG interacting factor 1                                                                           | Debra Fulton       | 8537382   | TF Gene           | DNA-Binding: sequence-specific                                                     |
| 245583  | Tgif2lx     | TGFB-induced factor homeobox 2-like, X-linked                                                     | Sarav Sundararajan | 8537382   | TF Gene           | DNA-Binding: sequence-specific                                                     |
| 18185   | Nrl         | neural retina leucine zipper gene                                                                 | Amy Ticoll         | 8552602   | TF Gene           | DNA-Binding: sequence-specific                                                     |
| 18185   | Nrl         | neural retina leucine zipper gene                                                                 | Stuart Lithwick    | 8552602   | TF Gene           | DNA-Binding: non-sequence-specific                                                 |
| 18185   | Nrl         | neural retina leucine zipper gene                                                                 | Warren Cheung      | 8552602   | TF Gene Candidate | DNA-Binding: sequence-specific; Transcription Factor Binding: TF co-factor binding |
| 83796   | Smarcd2     | SWI/SNF related, matrix associated, actin dependent regulator of chromatin, subfamily d, member 2 | Debra Fulton       | 8804307   | TF Gene Candidate | Transcription Regulatory Activity: heterochromatin interaction/binding             |
| 83797   | Smarcd1     | SWI/SNF related, matrix associated, actin dependent regulator of chromatin, subfamily d, member 1 | Tim Hughes         | 8804307   | TF Gene           | Transcription Regulatory Activity: heterochromatin interaction/binding             |

**Table S3.** Summary of independent annotations of TFs when the same PubMed evidence was used (continued)

| Gene ID | Gene Symbol | Description                                                                 | Reviewer           | PubMed ID | Judgment             | Taxa                                                                                   |
|---------|-------------|-----------------------------------------------------------------------------|--------------------|-----------|----------------------|----------------------------------------------------------------------------------------|
| 15437   | Hoxd8       | homeo box D8                                                                | Shannan HoSui      | 8890171   | TF Gene Candidate    | DNA-Binding: sequence-specific; Transcription Factor Binding: TF co-factor binding     |
| 15438   | Hoxd9       | homeo box D9                                                                | Amy Ticoll         | 8890171   | TF Gene              | DNA-Binding: sequence-specific                                                         |
| 71702   | Cdc5l       | cell division cycle 5-like (S. pombe)                                       | Sarav Sundararajan | 8917598   | TF Evidence Conflict |                                                                                        |
| 71702   | Cdc5l       | cell division cycle 5-like (S. pombe)                                       | Rob Sladek         | 8917598   | TF Evidence Conflict |                                                                                        |
| 11614   | Nr0b1       | nuclear receptor subfamily 0, group B, member 1                             | Sarav Sundararajan | 9032275   | TF Gene              | DNA-Binding: non-sequence-specific; Transcription Factor Binding: TF co-factor binding |
| 11614   | Nr0b1       | nuclear receptor subfamily 0, group B, member 1                             | Rob Sladek         | 9032275   | TF Gene              | DNA-Binding: non-sequence-specific                                                     |
| 71702   | Cdc5l       | cell division cycle 5-like (S. pombe)                                       | Debra Fulton       | 9038199   | TF Evidence Conflict |                                                                                        |
| 71702   | Cdc5l       | cell division cycle 5-like (S. pombe)                                       | Rob Sladek         | 9038199   | TF Evidence Conflict |                                                                                        |
| 15396   | Hoxa11      | homeo box A11                                                               | Rob Sladek         | 9079637   | TF Gene              | DNA-Binding: sequence-specific                                                         |
| 15417   | Hoxb9       | homeo box B9                                                                | Andrew Kwon        | 9079637   | TF Gene              | DNA-Binding: sequence-specific; Transcription Factor Binding: TF co-factor binding     |
| 19668   | Rbpjl       | recombination signal binding protein for immunoglobulin kappa J region-like | Stuart Lithwick    | 9111338   | TF Gene              | DNA-Binding: sequence-specific                                                         |
| 19668   | Rbpjl       | recombination signal binding protein for immunoglobulin kappa J region-like | Warren Cheung      | 9111338   | TF Gene              | DNA-Binding: sequence-specific                                                         |
| 19668   | Rbpjl       | recombination signal binding protein for immunoglobulin kappa J region-like | Amy Ticoll         | 9111338   | TF Gene              | DNA-Binding: sequence-specific                                                         |
| 19668   | Rbpjl       | recombination signal binding protein for immunoglobulin kappa J region-like | Magdalena Swanson  | 9111338   | TF Gene              | DNA-Binding: sequence-specific                                                         |
| 17977   | Ncoa1       | nuclear receptor coactivator 1                                              | Sarav Sundararajan | 9192892   | TF Gene Candidate    | Transcription Factor Binding: TF co-factor binding                                     |
| 17979   | Ncoa3       | nuclear receptor coactivator 3                                              | Rob Sladek         | 9192892   | TF Gene              | Transcription Factor Binding: TF co-factor binding                                     |

**Table S3.** Summary of independent annotations of TFs when the same PubMed evidence was used (continued)

| Gene ID | Gene Symbol | Description                                                                       | Reviewer           | PubMed ID | Judgment             | Taxa                                                                                   |
|---------|-------------|-----------------------------------------------------------------------------------|--------------------|-----------|----------------------|----------------------------------------------------------------------------------------|
| 11614   | Nr0b1       | nuclear receptor subfamily 0, group B, member 1                                   | Sarav Sundararajan | 9384387   | TF Gene              | DNA-Binding: non-sequence-specific; Transcription Factor Binding: TF co-factor binding |
| 11614   | Nr0b1       | nuclear receptor subfamily 0, group B, member 1                                   | Debra Fulton       | 9384387   | TF Gene              | DNA-Binding: non-sequence-specific; Transcription Factor Binding: TF co-factor binding |
| 11614   | Nr0b1       | nuclear receptor subfamily 0, group B, member 1                                   | Rob Sladek         | 9384387   | TF Gene              | DNA-Binding: non-sequence-specific                                                     |
| 13392   | Dlx2        | distal-less homeobox 2                                                            | Andrew Kwon        | 9415433   | TF Gene              | DNA-Binding: sequence-specific                                                         |
| 13396   | Dlx6        | distal-less homeobox 6                                                            | Andrew Kwon        | 9415433   | TF Gene Candidate    | DNA-Binding: sequence-specific                                                         |
| 13194   | Ddb1        | damage specific DNA binding protein 1                                             | Debra Fulton       | 9418871   | TF Gene Candidate    | Single stranded RNA/DNA binding; Transcription Factor Binding: TF co-factor binding    |
| 107986  | Ddb2        | damage specific DNA binding protein 2                                             | Sarav Sundararajan | 9418871   | TF Gene Candidate    | Single stranded RNA/DNA binding; Transcription Factor Binding: TF co-factor binding    |
| 107986  | Ddb2        | damage specific DNA binding protein 2                                             | Debra Fulton       | 9418871   | TF Gene Candidate    | Single stranded RNA/DNA binding; Transcription Factor Binding: TF co-factor binding    |
| 12705   | Cited1      | Cbp/p300-interacting transactivator with Glu/Asp-rich carboxy-terminal domain 1   | Wyeth Wasserman    | 9434189   | TF Gene              | Transcription Factor Binding: TF co-factor binding                                     |
| 17684   | Cited2      | Cbp/p300-interacting transactivator, with Glu/Asp-rich carboxy-terminal domain, 2 | Wyeth Wasserman    | 9434189   | TF Gene              | Transcription Factor Binding: TF co-factor binding                                     |
| 19727   | Rfxank      | regulatory factor X-associated ankyrin-containing protein                         | Tim Hughes         | 9806546   | TF Gene              | Transcription Factor Binding: TF co-factor binding                                     |
| 53970   | Rfx5        | regulatory factor X, 5 (influences HLA class II expression)                       | Amy Ticoll         | 9806546   | TF Gene Candidate    | DNA-Binding: sequence-specific; Transcription Factor Binding: TF co-factor binding     |
| 16597   | Klf12       | Kruppel-like factor 12                                                            | Sarav Sundararajan | 9858544   | TF Gene              | DNA-Binding: sequence-specific                                                         |
| 16601   | Klf9        | Kruppel-like factor 9                                                             | Debra Fulton       | 9858544   | TF Gene              | DNA-Binding: sequence-specific                                                         |
| 71702   | Cdc5l       | cell division cycle 5-like (S. pombe)                                             | Debra Fulton       | 10570151  | TF Evidence Conflict |                                                                                        |
| 71702   | Cdc5l       | cell division cycle 5-like (S. pombe)                                             | Rob Sladek         | 10570151  | TF Evidence Conflict |                                                                                        |



**Table S3.** Summary of independent annotations of TFs when the same PubMed evidence was used (continued)

| Gene ID | Gene Symbol | Description                                                                           | Reviewer           | PubMed ID | Judgment | Taxa                                                                                   |
|---------|-------------|---------------------------------------------------------------------------------------|--------------------|-----------|----------|----------------------------------------------------------------------------------------|
| 19434   | Rax         | retina and anterior neural fold homeobox                                              | Amy Ticoll         | 10625658  | TF Gene  | DNA-Binding: sequence-specific                                                         |
| 19434   | Rax         | retina and anterior neural fold homeobox                                              | Magdalena Swanson  | 10625658  | TF Gene  | DNA-Binding: sequence-specific                                                         |
| 19434   | Rax         | retina and anterior neural fold homeobox                                              | Stuart Lithwick    | 10625658  | TF Gene  | DNA-Binding: sequence-specific                                                         |
| 19434   | Rax         | retina and anterior neural fold homeobox                                              | Warren Cheung      | 10625658  | TF Gene  | Transcription Factor Binding: TF co-factor binding                                     |
| 11634   | Aire        | autoimmune regulator (autoimmune polyendocrinopathy candidiasis ectodermal dystrophy) | Sarav Sundararajan | 10748110  | TF Gene  | DNA-Binding: sequence-specific                                                         |
| 11634   | Aire        | autoimmune regulator (autoimmune polyendocrinopathy candidiasis ectodermal dystrophy) | Debra Fulton       | 10748110  | TF Gene  | DNA-Binding: non-sequence-specific                                                     |
| 11925   | Neurog3     | neurogenin 3                                                                          | Amy Ticoll         | 10757813  | TF Gene  | DNA-Binding: sequence-specific                                                         |
| 11925   | Neurog3     | neurogenin 3                                                                          | Magdalena Swanson  | 10757813  | TF Gene  | DNA-Binding: sequence-specific                                                         |
| 11614   | Nr0b1       | nuclear receptor subfamily 0, group B, member 1                                       | Sarav Sundararajan | 10848616  | TF Gene  | DNA-Binding: non-sequence-specific; Transcription Factor Binding: TF co-factor binding |
| 11614   | Nr0b1       | nuclear receptor subfamily 0, group B, member 1                                       | Rob Sladek         | 10848616  | TF Gene  | DNA-Binding: non-sequence-specific                                                     |
| 56809   | Gmeb1       | glucocorticoid modulatory element binding protein 1                                   | Andrew Kwon        | 10894151  | TF Gene  | DNA-Binding: sequence-specific; Transcription Factor Binding: TF co-factor binding     |
| 229004  | Gmeb2       | glucocorticoid modulatory element binding protein 2                                   | Magdalena Swanson  | 10894151  | TF Gene  | DNA-Binding: sequence-specific; Transcription Factor Binding: TF co-factor binding     |
| 22772   | Zic2        | zinc finger protein of the cerebellum 2                                               | Debra Fulton       | 11053430  | TF Gene  | DNA-Binding: sequence-specific                                                         |
| 22773   | Zic3        | zinc finger protein of the cerebellum 3                                               | Tim Hughes         | 11053430  | TF Gene  | DNA-Binding: sequence-specific                                                         |
| 19434   | Rax         | retina and anterior neural fold homeobox                                              | David Martin       | 11069920  | TF Gene  | Transcription Factor Binding: TF co-factor binding                                     |
| 19434   | Rax         | retina and anterior neural fold homeobox                                              | Warren Cheung      | 11069920  | TF Gene  | Transcription Factor Binding: TF co-factor binding                                     |
| 223922  | Atf7        | activating transcription factor 7                                                     | Gwenael Breard     | 11278933  | TF Gene  | DNA-Binding: sequence-specific                                                         |
| 223922  | Atf7        | activating transcription factor 7                                                     | Sarav Sundararajan | 11278933  | TF Gene  | DNA-Binding: sequence-specific                                                         |

**Table S3.** Summary of independent annotations of TFs when the same PubMed evidence was used (continued)

| Gene ID | Gene Symbol | Description                           | Reviewer                | PubMed ID | Judgment          | Taxa                                                                                                                       |
|---------|-------------|---------------------------------------|-------------------------|-----------|-------------------|----------------------------------------------------------------------------------------------------------------------------|
| 15417   | Hoxb9       | homeo box B9                          | Andrew Kwon             | 11432851  | TF Gene           | DNA-Binding: sequence-specific; Transcription Factor Binding: TF co-factor binding                                         |
| 15430   | Hoxd10      | homeo box D10                         | David Martin            | 11432851  | TF Gene           | DNA-Binding: sequence-specific                                                                                             |
| 20689   | Sall3       | sal-like 3 (Drosophila)               | Magdalena Swanson       | 11836251  | TF Gene Candidate | Transcription Regulatory Activity: heterochromatin interaction/binding                                                     |
| 58198   | Sall1       | sal-like 1 (Drosophila)               | Stuart Lithwick         | 11836251  | TF Gene           | Transcription Regulatory Activity: heterochromatin interaction/binding                                                     |
| 20185   | Ncor1       | nuclear receptor co-repressor 1       | Elodie Portales-Casamar | 11997503  | TF Gene           | Transcription Regulatory Activity: heterochromatin interaction/binding; Transcription Factor Binding: TF co-factor binding |
| 20602   | Ncor2       | nuclear receptor co-repressor 2       | David Martin            | 11997503  | TF Gene Candidate | Transcription Factor Binding: TF co-factor binding                                                                         |
| 13194   | Ddb1        | damage specific DNA binding protein 1 | Jared Roach             | 12034848  | TF Gene Candidate | Transcription Factor Binding: TF co-factor binding                                                                         |
| 13194   | Ddb1        | damage specific DNA binding protein 1 | Rob Sladek              | 12034848  | TF Gene Candidate | Single stranded RNA/DNA binding                                                                                            |
| 107986  | Ddb2        | damage specific DNA binding protein 2 | Rob Sladek              | 12034848  | TF Gene Candidate | Transcription Factor Binding: TF co-factor binding                                                                         |
| 15410   | Hoxb3       | homeo box B3                          | Elodie Portales-Casamar | 12482716  | TF Gene           | DNA-Binding: sequence-specific                                                                                             |
| 15412   | Hoxb4       | homeo box B4                          | Elodie Portales-Casamar | 12482716  | TF Gene           | DNA-Binding: sequence-specific                                                                                             |
| 18503   | Pax1        | paired box gene 1                     | Sarav Sundararajan      | 12490554  | TF Gene           | DNA-Binding: sequence-specific                                                                                             |
| 18511   | Pax9        | paired box gene 9                     | Rob Sladek              | 12490554  | TF Gene           | DNA-Binding: sequence-specific                                                                                             |
| 21415   | Tcf3        | transcription factor 3                | Rob Sladek              | 14627819  | TF Gene           | DNA-Binding: sequence-specific                                                                                             |
| 21423   | Tcf2a       | transcription factor E2a              | Debra Fulton            | 14627819  | TF Gene           | DNA-Binding: sequence-specific                                                                                             |
| 74123   | Foxp4       | forkhead box P4                       | Amy Ticoll              | 14701752  | TF Gene           | DNA-Binding: sequence-specific                                                                                             |
| 114142  | Foxp2       | forkhead box P2                       | Rob Sladek              | 14701752  | TF Gene           | DNA-Binding: sequence-specific                                                                                             |
| 114142  | Foxp2       | forkhead box P2                       | Tim Hughes              | 14701752  | TF Gene           | DNA-Binding: sequence-specific                                                                                             |

**Table S3.** Summary of independent annotations of TFs when the same PubMed evidence was used (continued)

| Gene ID | Gene Symbol | Description                                                               | Reviewer                | PubMed ID | Judgment          | Taxa                                                                                                                                                             |
|---------|-------------|---------------------------------------------------------------------------|-------------------------|-----------|-------------------|------------------------------------------------------------------------------------------------------------------------------------------------------------------|
| 18185   | Nrl         | neural retina leucine zipper gene                                         | Magdalena Swanson       | 15001570  | TF Gene           | DNA-Binding: sequence-specific                                                                                                                                   |
| 18185   | Nrl         | neural retina leucine zipper gene                                         | Warren Cheung           | 15001570  | TF Gene Candidate | DNA-Binding: sequence-specific; Transcription Factor Binding: TF co-factor binding                                                                               |
| 20937   | Suv39h1     | suppressor of variegation 3-9 homolog 1 (Drosophila)                      | Debra Fulton            | 15107829  | TF Gene           | Transcription Factor Binding: TF co-factor binding                                                                                                               |
| 64707   | Suv39h2     | suppressor of variegation 3-9 homolog 2 (Drosophila)                      | Sarav Sundararajan      | 15107829  | TF Gene Candidate | Transcription Regulatory Activity: heterochromatin interaction / binding; Transcription Factor Binding: TF co-factor binding                                     |
| 18612   | Etv4        | ets variant gene 4 (E1A enhancer binding protein, E1AF)                   | Stuart Lithwick         | 15138262  | TF Gene           | DNA-Binding: sequence-specific; Transcription Factor Binding: TF co-factor binding                                                                               |
| 104156  | Etv5        | ets variant gene 5                                                        | Rob Sladek              | 15138262  | TF Gene           | DNA-Binding: sequence-specific                                                                                                                                   |
| 93760   | Arid1a      | AT rich interactive domain 1A (Swi1 like)                                 | Jared Roach             | 15170388  | TF Gene           | DNA-Binding: non-sequence-specific                                                                                                                               |
| 239985  | Arid1b      | AT rich interactive domain 1B (Swi1 like)                                 | Amy Ticoll              | 15170388  | TF Gene           | Transcription Regulatory Activity: heterochromatin interaction / binding; DNA-Binding: non-sequence-specific; Transcription Factor Binding: TF co-factor binding |
| 18021   | Nfatc3      | nuclear factor of activated T-cells, cytoplasmic, calcineurin-dependent 3 | Magdalena Swanson       | 15173172  | TF Gene           | DNA-Binding: sequence-specific                                                                                                                                   |
| 18021   | Nfatc3      | nuclear factor of activated T-cells, cytoplasmic, calcineurin-dependent 3 | Stuart Lithwick         | 15173172  | TF Gene           | DNA-Binding: sequence-specific                                                                                                                                   |
| 18021   | Nfatc3      | nuclear factor of activated T-cells, cytoplasmic, calcineurin-dependent 3 | Warren Cheung           | 15173172  | TF Gene           | DNA-Binding: sequence-specific; Transcription Factor Binding: TF co-factor binding                                                                               |
| 20671   | Sox17       | SRY-box containing gene 17                                                | Elodie Portales-Casamar | 15220343  | TF Gene           | DNA-Binding: sequence-specific                                                                                                                                   |
| 20680   | Sox7        | SRY-box containing gene 7                                                 | Amy Ticoll              | 15220343  | TF Gene           | DNA-Binding: sequence-specific                                                                                                                                   |
| 19290   | Pura        | purine rich element binding protein A                                     | Rob Sladek              | 15282343  | TF Gene           | Single stranded RNA/DNA binding                                                                                                                                  |
| 19291   | Purb        | purine rich element binding protein B                                     | Amy Ticoll              | 15282343  | TF Gene           | Single stranded RNA/DNA binding                                                                                                                                  |

**Table S3.** Summary of independent annotations of TFs when the same PubMed evidence was used (continued)

| Gene ID | Gene Symbol | Description                                                                                       | Reviewer                | PubMed ID | Judgment          | Taxa                                                                               |
|---------|-------------|---------------------------------------------------------------------------------------------------|-------------------------|-----------|-------------------|------------------------------------------------------------------------------------|
| 22774   | Zic4        | zinc finger protein of the cerebellum 4                                                           | Gwenael Breard          | 15465018  | TF Gene Candidate | DNA-Binding: sequence-specific                                                     |
| 65100   | Zic5        | zinc finger protein of the cerebellum 5                                                           | Wyeth Wasserman         | 15465018  | TF Gene           | DNA-Binding: sequence-specific                                                     |
| 18612   | Etv4        | ets variant gene 4 (E1A enhancer binding protein, E1AF)                                           | Stuart Lithwick         | 15466854  | TF Gene           | DNA-Binding: sequence-specific; Transcription Factor Binding: TF co-factor binding |
| 104156  | Etv5        | ets variant gene 5                                                                                | Rob Sladek              | 15466854  | TF Gene           | DNA-Binding: sequence-specific                                                     |
| 211323  | Nrg1        | neuregulin 1                                                                                      | Amy Ticoll              | 15494726  | TF Gene           | Transcription Factor Binding: TF co-factor binding                                 |
| 211323  | Nrg1        | neuregulin 1                                                                                      | Magdalena Swanson       | 15494726  | TF Gene Candidate | Transcription Factor Binding: TF co-factor binding                                 |
| 211323  | Nrg1        | neuregulin 1                                                                                      | Stuart Lithwick         | 15494726  | TF Gene Candidate | Transcription Factor Binding: TF co-factor binding                                 |
| 211323  | Nrg1        | neuregulin 1                                                                                      | Warren Cheung           | 15494726  | TF Gene           | Transcription Factor Binding: TF co-factor binding                                 |
| 66993   | Smarcd3     | SWI/SNF related, matrix associated, actin dependent regulator of chromatin, subfamily d, member 3 | Alice Chou              | 15525990  | TF Gene Candidate | Transcription Factor Binding: TF co-factor binding                                 |
| 83797   | Smarcd1     | SWI/SNF related, matrix associated, actin dependent regulator of chromatin, subfamily d, member 1 | Tim Hughes              | 15525990  | TF Gene           | Transcription Regulatory Activity: heterochromatin interaction /binding            |
| 12677   | Vsx2        | visual system homeobox 2                                                                          | Elodie Portales-Casamar | 15647262  | TF Gene           | DNA-Binding: sequence-specific                                                     |
| 114889  | Vsx1        | visual system homeobox 1 homolog (zebrafish)                                                      | Tim Hughes              | 15647262  | TF Gene           | DNA-Binding: sequence-specific                                                     |
| 11634   | Aire        | autoimmune regulator (autoimmune polyendocrinopathy candidiasis ectodermal dystrophy)             | Debra Fulton            | 15649436  | TF Gene           | DNA-Binding: non-sequence-specific                                                 |
| 11634   | Aire        | autoimmune regulator (autoimmune polyendocrinopathy candidiasis ectodermal dystrophy)             | Rob Sladek              | 15649436  | TF Gene           | DNA-Binding: non-sequence-specific                                                 |
| 107503  | Atf5        | activating transcription factor 5                                                                 | Debra Fulton            | 15735663  | TF Gene           | DNA-Binding: sequence-specific                                                     |
| 223922  | Atf7        | activating transcription factor 7                                                                 | Sarav Sundararajan      | 15735663  | TF Gene           | DNA-Binding: sequence-specific                                                     |

**Table S3.** Summary of independent annotations of TFs when the same PubMed evidence was used (continued)

| Gene ID | Gene Symbol | Description                                                               | Reviewer                | PubMed ID | Judgment          | Taxa                                                                               |
|---------|-------------|---------------------------------------------------------------------------|-------------------------|-----------|-------------------|------------------------------------------------------------------------------------|
| 15395   | Hoxa10      | homeo box A10                                                             | Jared Roach             | 15886193  | TF Gene           | DNA-Binding: sequence-specific                                                     |
| 15416   | Hoxb8       | homeo box B8                                                              | Debra Fulton            | 15886193  | TF Gene           | DNA-Binding: sequence-specific                                                     |
| 15110   | Hand1       | heart and neural crest derivatives expressed transcript 1                 | Amy Ticoll              | 16043483  | TF Gene           | Transcription Factor Binding: TF co-factor binding                                 |
| 15110   | Hand1       | heart and neural crest derivatives expressed transcript 1                 | Stuart Lithwick         | 16043483  | TF Gene           | DNA-Binding: sequence-specific                                                     |
| 15110   | Hand1       | heart and neural crest derivatives expressed transcript 1                 | Warren Cheung           | 16043483  | TF Gene           | DNA-Binding: sequence-specific; Transcription Factor Binding: TF co-factor binding |
| 55942   | Sertad1     | SERTA domain containing 1                                                 | Elodie Portales-Casamar | 16098148  | TF Gene           | Transcription Factor Binding: TF co-factor binding                                 |
| 58172   | Sertad2     | SERTA domain containing 2                                                 | Amy Ticoll              | 16098148  | TF Gene           | Transcription Factor Binding: TF co-factor binding                                 |
| 27386   | Npas3       | neuronal PAS domain protein 3                                             | Amy Ticoll              | 16172381  | TF Gene Candidate | DNA-Binding: sequence-specific                                                     |
| 27386   | Npas3       | neuronal PAS domain protein 3                                             | Stuart Lithwick         | 16172381  | TF Gene Candidate | Transcription Regulatory Activity: heterochromatin interaction / binding           |
| 27386   | Npas3       | neuronal PAS domain protein 3                                             | Warren Cheung           | 16172381  | TF Gene Candidate | Transcription Factor Binding: TF co-factor binding                                 |
| 11925   | Neurog3     | neurogenin 3                                                              | Amy Ticoll              | 16511571  | TF Gene           | DNA-Binding: sequence-specific                                                     |
| 11925   | Neurog3     | neurogenin 3                                                              | Magdalena Swanson       | 16511571  | TF Gene           | DNA-Binding: sequence-specific                                                     |
| 11925   | Neurog3     | neurogenin 3                                                              | Stuart Lithwick         | 16511571  | TF Gene           | DNA-Binding: non-sequence-specific                                                 |
| 11925   | Neurog3     | neurogenin 3                                                              | Warren Cheung           | 16511571  | TF Gene           | DNA-Binding: sequence-specific                                                     |
| 73181   | Nfatc4      | nuclear factor of activated T-cells, cytoplasmic, calcineurin-dependent 4 | Magdalena Swanson       | 16644691  | TF Gene           | DNA-Binding: sequence-specific                                                     |
| 73181   | Nfatc4      | nuclear factor of activated T-cells, cytoplasmic, calcineurin-dependent 4 | Stuart Lithwick         | 16644691  | TF Gene           | DNA-Binding: sequence-specific                                                     |
| 73181   | Nfatc4      | nuclear factor of activated T-cells, cytoplasmic, calcineurin-dependent 4 | Warren Cheung           | 16644691  | TF Gene           | DNA-Binding: sequence-specific                                                     |

**Table S4.** Detected DNA-binding domains predicted in judged TF genes using PFAM and Superfamily group models

| PFAM HMM        | Superfamily Relationship                                 |
|-----------------|----------------------------------------------------------|
| AF-4            |                                                          |
| ARID            | ARID-like                                                |
| AT_hook         |                                                          |
| Beta-trefoil    | DNA-binding protein LAG-1 (CSL)                          |
| bZIP_1          |                                                          |
| bZIP_2          |                                                          |
| bZIP_Maf        | A DNA-binding domain in eukaryotic transcription factors |
| CBFB_NFYA       |                                                          |
| CBFD_NFYB_HMF   |                                                          |
| CP2             |                                                          |
| CUT             |                                                          |
| DDT             |                                                          |
| E2F_TDP         | Winged helix DNA-binding domain                          |
| Ets             | Winged helix DNA-binding domain                          |
| Fork_head       | Winged helix DNA-binding domain                          |
| GATA            | Glucocorticoid receptor-like (DNA-binding domain)        |
| GCM             | GCM domain                                               |
| GTF2I           |                                                          |
| HLH             | HLH, helix-loop-helix DNA-binding domain                 |
| HMG_box         | HMG-box                                                  |
| Homeobox        | Homeodomain-like                                         |
| HSF_DNA-bind    | Winged helix DNA-binding domain                          |
| HTH_psq         | Homeodomain-like                                         |
| IRF             | Winged helix DNA-binding domain                          |
| LAG1-DNAbind    | p53-like transcription factors                           |
| MBD             | DNA-binding domain                                       |
| MH1             | SMAD MH1 domain                                          |
| Myb_DNA-binding | Homeodomain-like                                         |
| P53             | p53-like transcription factors                           |
| PAX             | Homeodomain-like                                         |
| Pou             |                                                          |
| RFX_DNA_binding | Winged helix DNA-binding domain                          |
| RHD             | p53-like transcription factors                           |

**Table S4.** Detected DNA-binding domains predicted in judged TF genes using PFAM and Superfamily group models (continued)

| <b>PFAM HMM</b> | <b>Superfamily Relationship</b>                              |
|-----------------|--------------------------------------------------------------|
| RNA_pol_Rpb2_1  | beta and beta-prime subunits of DNA dependent RNA-polymerase |
| RNA_pol_Rpb2_2  | beta and beta-prime subunits of DNA dependent RNA-polymerase |
| RNA_pol_Rpb2_3  | beta and beta-prime subunits of DNA dependent RNA-polymerase |
| RNA_pol_Rpb2_4  | beta and beta-prime subunits of DNA dependent RNA-polymerase |
| RNA_pol_Rpb2_5  | beta and beta-prime subunits of DNA dependent RNA-polymerase |
| RNA_pol_Rpb2_6  | beta and beta-prime subunits of DNA dependent RNA-polymerase |
| RNA_pol_Rpb2_7  | beta and beta-prime subunits of DNA dependent RNA-polymerase |
| Runt            | p53-like transcription factors                               |
| SAND            | SAND domain-like                                             |
| SLIDE           | Homeodomain-like                                             |
| SRF-TF          | SRF-like                                                     |
| STAT_bind       | p53-like transcription factors                               |
| T-box           | p53-like transcription factors                               |
| TBP             | TATA-box binding protein-like                                |
| TEA             |                                                              |
| TF_AP-2         |                                                              |
| TF_Otx          |                                                              |
| zf-C2H2         | C2H2 and C2HC zinc fingers                                   |
| zf-C2HC         | CCHHC domain                                                 |
| zf-C4           | Glucocorticoid receptor-like (DNA-binding domain)            |
| zf-CXXC         |                                                              |

**Table S5.** DNA-binding classification extensions to Luscombe *et al.* classification system

| Protein Structure Group      | Protein Structure Family | Description                                                                                                                                                                                                                                                                                                                                                                                                                                                                                                                                                                                                                                                                                                                                                                                                                                                                                                                                                                                                                                                                                                                                                                                                                                                                                                                                       | Comments                       |
|------------------------------|--------------------------|---------------------------------------------------------------------------------------------------------------------------------------------------------------------------------------------------------------------------------------------------------------------------------------------------------------------------------------------------------------------------------------------------------------------------------------------------------------------------------------------------------------------------------------------------------------------------------------------------------------------------------------------------------------------------------------------------------------------------------------------------------------------------------------------------------------------------------------------------------------------------------------------------------------------------------------------------------------------------------------------------------------------------------------------------------------------------------------------------------------------------------------------------------------------------------------------------------------------------------------------------------------------------------------------------------------------------------------------------|--------------------------------|
| 1.2) Winged Helix-Turn-Helix |                          | The winged HTH motif is an extension of the HTH group, which is characterized by a third or fourth alpha-helix and an adjacent beta-sheet.                                                                                                                                                                                                                                                                                                                                                                                                                                                                                                                                                                                                                                                                                                                                                                                                                                                                                                                                                                                                                                                                                                                                                                                                        | Group description modification |
| 1.1) Helix-Turn-Helix        | 100) Myb Domain Family   | <p>The Myb vertebrate DBD consists of three tandem repeats of 51 to 53 amino acid residues from the amino acid terminus, herein referred to as R1, R2, and R3 (Kanei-Ishii <i>et al.</i> 1990). Each repeat contains three helices of a helix-turn-helix motif <math>\alpha 1</math>, <math>\alpha 2</math>, and <math>\alpha 3</math> (Ogata <i>et al.</i> 1992; Ogata <i>et al.</i> 1995) with R2 and R3 involved in specific DNA recognition and R1 covers the DNA position next to the R2 binding site. The R1, R2, and R3 bind to DNA mainly in the major groove (Tahirov <i>et al.</i> 2002).</p> <p>The relationship between the protein domains of Myb and Rap1 is heavily covered in the literature. While there is a clear sequence similarity, there are important differences between the two regions in the proteins. A study by Hanaoka <i>et al.</i> (Hanaoka <i>et al.</i> 2001) compares the Myb-like domains. The human Rap1 protein fragment solution structure PDB: 1FEX appears to share structural similarity to Myb. However, yeast Rap1 associated with DNA (available in PDB 1IGN) does not align well with Myb. It is noteworthy that the yeast (SC) protein does have observed DNA binding capacity while the human seems to require interaction with TRF2 for association with DNA (O'Connor <i>et al.</i> 2004).</p> | Family added                   |
| 1.2) Winged Helix-Turn-Helix | 101) GTF2I Domain Family | DNA-binding studies suggest that GTF2I domain binds DNA (Rauhala <i>et al.</i> 2005); (Vullhorst <i>et al.</i> 2003). At the time of our analysis, no DNA-bound protein structures were available for review. However, structural alignments using an NMR-based structure suggest that this domain may take on a Helix-Turn-Helix configuration. Based on its unique conformation we predict that its DNA binding mechanism will likely support its own HTH family.                                                                                                                                                                                                                                                                                                                                                                                                                                                                                                                                                                                                                                                                                                                                                                                                                                                                               | Family added – predicted       |



**Table S5.** DNA-binding classification extensions (continued)

| <b>Protein Structure Group</b> | <b>Protein Structure Family</b>              | <b>Description</b>                                                                                                                                                                                                                                                                                                                                                                                                                                                                                | <b>Comments</b> |
|--------------------------------|----------------------------------------------|---------------------------------------------------------------------------------------------------------------------------------------------------------------------------------------------------------------------------------------------------------------------------------------------------------------------------------------------------------------------------------------------------------------------------------------------------------------------------------------------------|-----------------|
| 1.2) Winged Helix-Turn-Helix   | 102) Forkhead Domain Family                  | The forkhead domain binds DNA as a monomer (Clark et al. 1993). Three or four helices are set against a small three-stranded antiparallel beta-sheet from which two large loops extend (Clark et al. 1993; van Dongen et al. 2000). DNA binding occurs largely through the third helix inserted in the major groove of the DNA (Clark et al. 1993). The wings of the forkhead domain also make contact with the DNA and may contribute to sequence specificity (Bravieri et al. 1997).            | Family added    |
| 1.2) Winged Helix-Turn-Helix   | 103) RFX Domain Family                       | The hRFX1 DBD consists of three alpha-helices, three beta-strands, and three connecting loops (Gajiwala et al. 2000). The third loop, connecting beta-strands S2 and S3, forms wing W1 of the winged-helix motif and makes contact with the DNA in the major groove, along with beta-strands S2 and S3. In contrast to other winged-helix DBDs, RFX has only 1 wing.                                                                                                                              | Family added    |
| 2) Zinc-coordinating Group     | 104) GATA Domain Family                      | The GATA domain is composed of a core: a zinc coordinated by four cysteines and a carboxyl-terminal tail (Omichinski et al. 1993). Specifically, the core consists of a two anti-parallel Beta-sheets and an alpha helix connected to a long loop that tethers a carboxyl-terminal tail. DNA contact is made through a helix and loop connecting the two Beta-sheets in the major groove and carboxyl-terminal tail around the DNA making contact with the minor groove (Omichinski et al. 1993). | Family added    |
| 2) Zinc-coordinating Group     | 105) Glial Cells Missing (GCM) Domain Family | The GCM domain is composed of one five- and one three-stranded Beta sheet, with three small helical segments packed against the same side of the two beta-sheets (Cohen et al. 2003). The 5-stranded Beta-sheet is inserted into the major groove of the DNA. Residues from the edge of the Beta sheet and the following loop and strand contact the DNA backbone and bases - providing the sequence specificity (Cohen et al. 2003).                                                             | Family added    |

**Table S5.** DNA-binding classification extensions (continued)

| <b>Protein Structure Group</b> | <b>Protein Structure Family</b>              | <b>Description</b>                                                                                                                                                                                                                                                                                                                                                                                                                                                                                                                                                                                                                                                                                                                                                                                                                                                        | <b>Comments</b>          |
|--------------------------------|----------------------------------------------|---------------------------------------------------------------------------------------------------------------------------------------------------------------------------------------------------------------------------------------------------------------------------------------------------------------------------------------------------------------------------------------------------------------------------------------------------------------------------------------------------------------------------------------------------------------------------------------------------------------------------------------------------------------------------------------------------------------------------------------------------------------------------------------------------------------------------------------------------------------------------|--------------------------|
| 2) Zinc-coordinating Group     | 106) MH1 Domain Family                       | Smad3 MH1 domain consists of four alpha-helices, six beta-strands, and five loops. The Smad MH1 domain contains a novel DNA-binding motif, an 11-residue beta-hairpin (formed by the second and third beta-strands), is embedded asymmetrically in the major groove of DNA (Chai et al. 2003). The MH1 domain contains a bound zinc atom coordinated by three cysteines and one histidine. Removal of the zinc atom results in reduced DNA binding activity. However, not all MH1-containing proteins can bind to DNA (such as Smad1). Sequence analyses suggest that the DNA-binding domains of CTF/NFI and SMAD MH1 demonstrate significant sequence homology (Stefancsik et al. 2003).                                                                                                                                                                                 | Family added             |
| 4) Other Alpha-Helix Group     | 107) Sand Domain Family                      | The GMEb1 Sand domain adopts a compact fold with an alpha-helical face and a twisted Beta-sheet face (Surdo et al. 2003). At the time of our analysis, no DNA-bound protein structures were available for review. However, the DNA binding surface has been mapped to the alpha-helical region encompassing the KDWK motif (Bottomley et al. 2001; Surdo et al. 2003). The GMEB1 SAND domain contains a zinc-binding motif and, although the zinc ion is not required for DNA binding, it plays a role in determining the C-terminal conformation of the GMEB1 SAND domain (Surdo et al. 2003).                                                                                                                                                                                                                                                                           | Family added – predicted |
| 6) Beta Hairpin_Ribbon Group   | 108) Methyl-CpG-binding Domain, Family (MBD) | The MBD folds into an alpha/beta sandwich structure, which is comprised of a layer of twisted beta-sheet, backed by another layer formed by the alpha helix 1 and a hairpin loop at the C terminus. The beta sheet is composed of two long inner strands (beta-strand 2 and beta-strand 3) sandwiched by two shorter outer strands (beta-strand 1 and beta-strand 4) (Ohki et al. 2001). A section of the inner strands that projects beyond the outer strands is embedded in the major groove at the target DNA site and, together with the loop that links beta-strand 2 and beta-strand 3, forms the principal DNA interface. The twisted beta-sheet is angled within the major groove to wedge the C-terminal part of beta-strand 4. This orientation of the beta-sheet allows alpha-helix 1 and loop 2 to mediate major groove contacts with DNA (Ohki et al. 2001). | Family added             |

**Table S5.** DNA-binding classification extensions (continued)

| <b>Protein Structure Group</b> | <b>Protein Structure Family</b> | <b>Description</b>                                                                                                                                                                                                                                                                                                                                                                                                                                                                                                                                                                                                                                                                                                                                                                                                                                                                                                                                                                                                                                                                                                                                                                                                                                                                                                                                              | <b>Comments</b> |
|--------------------------------|---------------------------------|-----------------------------------------------------------------------------------------------------------------------------------------------------------------------------------------------------------------------------------------------------------------------------------------------------------------------------------------------------------------------------------------------------------------------------------------------------------------------------------------------------------------------------------------------------------------------------------------------------------------------------------------------------------------------------------------------------------------------------------------------------------------------------------------------------------------------------------------------------------------------------------------------------------------------------------------------------------------------------------------------------------------------------------------------------------------------------------------------------------------------------------------------------------------------------------------------------------------------------------------------------------------------------------------------------------------------------------------------------------------|-----------------|
| 1.2) Winged Helix              | 109) Arid Domain Family         | Arid family proteins can be grouped into subfamilies based on sequence similarity. A majority of these subfamilies bind DNA without obvious sequence specificity (Patsialou et al. 2005)). Arid appears to interact with both the major and minor DNA grooves. Major groove DNA contact is made through insertion of a loop (Kim et al. 2004) and/or an $\alpha$ -helix (Iwahara et al. 2002).                                                                                                                                                                                                                                                                                                                                                                                                                                                                                                                                                                                                                                                                                                                                                                                                                                                                                                                                                                  | Family added    |
| 7) Other                       | 110) Runt Domain Family         | <p>The Runt domain recognizes specific bases in both the major and minor grooves of the DNA, and binding is accomplished mainly using loops. CBF<math>\alpha</math> Run domain makes contact with the DNA consensus sequence using three loop-containing regions: Beta-strand 3- Loop 3, Beta-strand 9 – Loop 9, and Beta-strand 12 – Loop 12 (Backstrom et al. 2002). The first and third loop interact with the major groove, while the second interacts with the minor groove. Two chloride ions bind to the Runt domain one of which is situated at the DNA-binding surface and are shown to have a positive effect on DNA binding (Backstrom et al. 2002).</p> <p>Structural comparisons demonstrate that the s-type Ig fold found in the Runt domain is conserved in the Ig folds found in the DNA-binding domains of NF-kappaB, NFAT, p53, STAT-1, and the T-domain. The differences among these proteins arise in the connecting loop regions where short additional secondary structural elements have been added that in some cases interact with the core Ig scaffold (Berardi et al. 1999). These proteins appear to form a family of structurally and functionally related DNA-binding domains. Unlike the other members of this family, the Runt domain utilizes loops at both ends of the Ig fold for DNA recognition (Berardi et al. 1999).</p> | Added family    |

**Table S5.** DNA-binding classification extensions (continued)

| <b>Protein Structure Group</b> | <b>Protein Structure Family</b>         | <b>Description</b>                                                                                                                                                                                                                                                                                                                                                                                                                                                                                                                                                                                                                                                                                  | <b>Comments</b>          |
|--------------------------------|-----------------------------------------|-----------------------------------------------------------------------------------------------------------------------------------------------------------------------------------------------------------------------------------------------------------------------------------------------------------------------------------------------------------------------------------------------------------------------------------------------------------------------------------------------------------------------------------------------------------------------------------------------------------------------------------------------------------------------------------------------------|--------------------------|
| 1.2) Winged Helix-Turn-Helix   | 111) Slide Domain Family                | The three core helices of the Slide domain superimpose well with c-Myb repeats. The slide domain appears to be highly compatible with a role in DNA binding given that it has an overall positive charge and c-MYB DNA-contacting residues are largely conserved in the slide domain (Grune et al. 2003). At the time of our analysis, no DNA-bound protein structures were available for review. However, given its similarities with the c-Myb protein structure, we predict that the Slide DNA binding structure may take on a helix-turn-helix (HTH) conformation and, as such, have classified in its own HTH family and will revisit this assignment when a DNA-bound structure is available. | Family added – predicted |
| 7) Other                       | 112) Beta-trefoil-like                  | The beta-trefoil domain (BTD) is a capped beta-barrel. The prototypical BTD consists of four strands repeated in a three-fold arrangement, where beta-strands 1 and 4 form the walls of the barrel and beta – strands 1 and 2 form the cap of the barrel. However, the CSL protein's BTD poses minor deviations from this (Kovall et al. 2004). In CSL the BTD makes specific contact with the DNA minor groove DNA and non-specific contact with the phosphate-ribose backbone (Kovall et al. 2004).                                                                                                                                                                                               | Family added             |
| 7)Other                        | 113) DNA-Binding LAG-1-like             | Lag-1 DNA binding domain is composed of a seven-stranded beta barrel organized into a sandwich composed of three- and four-stranded beta sheets (characteristics of an IG-like fold) (Kovall et al. 2004). In the CSL protein, the Lag-1 DNA binding domain interacts with the major groove of the DNA (Kovall et al. 2004).                                                                                                                                                                                                                                                                                                                                                                        | Family added             |
| 2) Zinc-coordinating Group     | 114) Non-methyl CpG-binding CXXC Domain | Three cysteine residues in two CGXCXXC motifs provide coordination for two zinc ions. Both motifs adopt a similar conformation in which the second and third cysteines are contained within a small helix or form a small helix-turn-helix. At the time of our analysis, no DNA-bound protein structures were available for review. However, NMR binding and mutagenesis data define the CXXC domain as the non-methyl CpG DNA binding interface (Allen et al. 2006).                                                                                                                                                                                                                               | Family added – predicted |

**Table S5.** DNA-binding classification extensions (continued)

| <b>Protein Structure Group</b> | <b>Protein Structure Family</b>                                     | <b>Description</b>                                                                                                                                                                                                                                                                                                                                                                                                                                                         | <b>Comments</b>            |
|--------------------------------|---------------------------------------------------------------------|----------------------------------------------------------------------------------------------------------------------------------------------------------------------------------------------------------------------------------------------------------------------------------------------------------------------------------------------------------------------------------------------------------------------------------------------------------------------------|----------------------------|
| 4) Other Alpha Helix Group     | 115) NF-Y CCAAT-Binding Protein Family                              | CBF/NF-Y is a heterotrimeric complex composed of NF-YA, NF-YB and NF-YC, which are all are required for DNA binding (Romier et al. 2003). CBF NF-YC and NF-YB are homologous to histones H2A and H2B (Sinha et al. 1995). Although there are no DNA-bound structures available for review, DNA recognition appears to involve both minor and major grooves interactions (inferred by methylation interference patterns) (Ronchi et al. 1995).                              |                            |
| 999) Unclassified Structure    | 901) CP2 Transcription Factor Domain Family                         | The DNA binding domain of CP2-like genes has been experimentally identified (Rodda et al. 2001) and appears to be somewhat conserved in the fly Grainyhead TF (Uv et al. 1994). At the time of our analysis, no protein structure was available for review.                                                                                                                                                                                                                | Unclassified DBD structure |
| 999) Unclassified Structure    | 902) AF-4 Protein Family                                            | AF-4 proteins have been shown to bind DNA <i>in vitro</i> (Ma et al. 1996). However, the structural DNA binding mechanism is unclear.                                                                                                                                                                                                                                                                                                                                      | Unclassified DBD structure |
| 999) Unclassified Structure    | 903) DNA binding homeobox and Different Transcription factors (DDT) | Experimental analysis of Fac1 (a truncated version of bromodomain PHD finger transcription factors) demonstrates that the N-terminal region, which includes the DDT domain, is involved in DNA-binding (Jordan-Sciutto et al. 1999). Secondary structure predictions suggest that DDT is composed of 3 alpha helices. However, fold recognition comparisons do not suggest any significant similarity to known DNA-RNA binding alpha-helical bundles (Doerks et al. 2001). | Unclassified DBD structure |
| 999) Unclassified Structure    | 904) AT-hook Domain Family                                          | The AT-Hook domain is the DNA-binding domain of the HMG1(Y) family of proteins. At the time of our analysis, the only DNA-bound structure available was HMGA1 (HMG-I(Y)). Unfortunately this structure is derived from NMR data produced over a decade ago and does not appear sufficiently detailed to confidently assess a structural family.                                                                                                                            | Unclassified DBD structure |

**Table S5.** DNA-binding classification extensions (continued)

| Protein Structure Group     | Protein Structure Family                                                    | Description                                                                                                                                                                                                                                                                                                                                                                                                                                                                                                                                                             | Comments                   |
|-----------------------------|-----------------------------------------------------------------------------|-------------------------------------------------------------------------------------------------------------------------------------------------------------------------------------------------------------------------------------------------------------------------------------------------------------------------------------------------------------------------------------------------------------------------------------------------------------------------------------------------------------------------------------------------------------------------|----------------------------|
| 999) Unclassified Structure | 905) Nuclear Factor I - CCAAT-binding Transcription Factor (NFI-CTF) Family | Nuclear Factor I NFI/CTI TFs can form both homo- and heterodimers (Kruse et al. 1994). At the time of our analysis, no protein structure was available for review. The family contains a conserved N-terminal DNA-binding domain (within the first 240 amino acids of CTF/NFI) (Gournari et al. 1990). Chicken and mammalian homolog genes incorporating this domain are NFI-A, NFI-B, and NFI-C (Rupp et al. 1990). Sequence analyses suggest that the DNA-binding domains of CTF/NFI and SMAD MH1 demonstrate significant sequence homology (Stefancsik et al. 2003). | Unclassified DBD structure |

**References for Table S5**

- Allen, M.D., C.G. Grummitt, C. Hilcenko, S.Y. Min, L.M. Tonkin, C.M. Johnson, S.M. Freund, M. Bycroft, and A.J. Warren. 2006. Solution structure of the nonmethyl-CpG-binding CXXC domain of the leukaemia-associated MLL histone methyltransferase. *Embo J* **25**: 4503-4512.
- Backstrom, S., M. Wolf-Watz, C. Grundstrom, T. Hard, T. Grundstrom, and U.H. Sauer. 2002. The RUNX1 Runt domain at 1.25A resolution: a structural switch and specifically bound chloride ions modulate DNA binding. *J Mol Biol* **322**: 259-272.
- Berardi, M.J., C. Sun, M. Zehr, F. Abildgaard, J. Peng, N.A. Speck, and J.H. Bushweller. 1999. The Ig fold of the core binding factor alpha Runt domain is a member of a family of structurally and functionally related Ig-fold DNA-binding domains. *Structure* **7**: 1247-1256.
- Bottomley, M.J., M.W. Collard, J.I. Huggenvik, Z. Liu, T.J. Gibson, and M. Sattler. 2001. The SAND domain structure defines a novel DNA-binding fold in transcriptional regulation. *Nat Struct Biol* **8**: 626-633.
- Bravieri, R., T. Shiyanova, T.H. Chen, D. Overdier, and X. Liao. 1997. Different DNA contact schemes are used by two winged helix proteins to recognize a DNA binding sequence. *Nucleic Acids Res* **25**: 2888-2896.
- Chai, J., J.W. Wu, N. Yan, J. Massague, N.P. Pavletich, and Y. Shi. 2003. Features of a Smad3 MH1-DNA complex. Roles of water and zinc in DNA binding. *J Biol Chem* **278**: 20327-20331.
- Clark, K.L., E.D. Halay, E. Lai, and S.K. Burley. 1993. Co-crystal structure of the HNF-3/fork head DNA-recognition motif resembles histone H5. *Nature* **364**: 412-420.
- Cohen, S.X., M. Moulin, S. Hashemolhosseini, K. Kilian, M. Wegner, and C.W. Muller. 2003. Structure of the GCM domain-DNA complex: a DNA-binding domain with a novel fold and mode of target site recognition. *Embo J* **22**: 1835-1845.
- Doerks, T., R. Copley, and P. Bork. 2001. DDT -- a novel domain in different transcription and chromosome remodeling factors. *Trends Biochem Sci* **26**: 145-146.
- Gajiwala, K.S., H. Chen, F. Cornille, B.P. Roques, W. Reith, B. Mach, and S.K. Burley. 2000. Structure of the winged-helix protein hRFX1 reveals a new mode of DNA binding. *Nature* **403**: 916-921.
- Gounari, F., R. De Francesco, J. Schmitt, P. van der Vliet, R. Cortese, and H. Stunnenberg. 1990. Amino-terminal domain of NF1 binds to DNA as a dimer and activates adenovirus DNA replication. *Embo J* **9**: 559-566.

- Grune, T., J. Brzeski, A. Eberharter, C.R. Clapier, D.F. Corona, P.B. Becker, and C.W. Muller. 2003. Crystal structure and functional analysis of a nucleosome recognition module of the remodeling factor ISWI. *Mol Cell* **12**: 449-460.
- Hanaoka, S., A. Nagadoi, S. Yoshimura, S. Aimoto, B. Li, T. de Lange, and Y. Nishimura. 2001. NMR structure of the hRap1 Myb motif reveals a canonical three-helix bundle lacking the positive surface charge typical of Myb DNA-binding domains. *J Mol Biol* **312**: 167-175.
- Iwahara, J., M. Iwahara, G.W. Daughdrill, J. Ford, and R.T. Clubb. 2002. The structure of the Dead ringer-DNA complex reveals how AT-rich interaction domains (ARIDs) recognize DNA. *Embo J* **21**: 1197-1209.
- Jordan-Sciutto, K.L., J.M. Dragich, and R. Bowser. 1999. DNA binding activity of the fetal Alz-50 clone 1 (FAC1) protein is enhanced by phosphorylation. *Biochem Biophys Res Commun* **260**: 785-789.
- Kanei-Ishii, C., A. Sarai, T. Sawazaki, H. Nakagoshi, D.N. He, K. Ogata, Y. Nishimura, and S. Ishii. 1990. The tryptophan cluster: a hypothetical structure of the DNA-binding domain of the myb protooncogene product. *J Biol Chem* **265**: 19990-19995.
- Kim, S., Z. Zhang, S. Upchurch, N. Isern, and Y. Chen. 2004. Structure and DNA-binding sites of the SWI1 AT-rich interaction domain (ARID) suggest determinants for sequence-specific DNA recognition. *J Biol Chem* **279**: 16670-16676.
- Kovall, R.A. and W.A. Hendrickson. 2004. Crystal structure of the nuclear effector of Notch signaling, CSL, bound to DNA. *Embo J* **23**: 3441-3451.
- Kruse, U. and A.E. Sippel. 1994. Transcription factor nuclear factor I proteins form stable homo- and heterodimers. *FEBS Lett* **348**: 46-50.
- Ma, C. and L.M. Staudt. 1996. LAF-4 encodes a lymphoid nuclear protein with transactivation potential that is homologous to AF-4, the gene fused to MLL in t(4;11) leukemias. *Blood* **87**: 734-745.
- O'Connor, M.S., A. Safari, D. Liu, J. Qin, and Z. Songyang. 2004. The human Rap1 protein complex and modulation of telomere length. *J Biol Chem* **279**: 28585-28591.
- Ogata, K., H. Hojo, S. Aimoto, T. Nakai, H. Nakamura, A. Sarai, S. Ishii, and Y. Nishimura. 1992. Solution structure of a DNA-binding unit of Myb: a helix-turn-helix-related motif with conserved tryptophans forming a hydrophobic core. *Proc Natl Acad Sci U S A* **89**: 6428-6432.
- Ogata, K., S. Morikawa, H. Nakamura, H. Hojo, S. Yoshimura, R. Zhang, S. Aimoto, Y. Ametani, Z. Hirata, A. Sarai et al. 1995. Comparison of the free and DNA-complexed forms of the DNA-binding domain from c-Myb. *Nat Struct Biol* **2**: 309-320.
- Ohki, I., N. Shimotake, N. Fujita, J. Jee, T. Ikegami, M. Nakao, and M. Shirakawa. 2001. Solution structure of the methyl-CpG binding domain of human MBD1 in complex with methylated DNA. *Cell* **105**: 487-497.
- Omichinski, J.G., G.M. Clore, O. Schaad, G. Felsenfeld, C. Trainor, E. Appella, S.J. Stahl, and A.M. Gronenborn. 1993. NMR structure of a specific DNA complex of Zn-containing DNA binding domain of GATA-1. *Science* **261**: 438-446.
- Patsialou, A., D. Wilsker, and E. Moran. 2005. DNA-binding properties of ARID family proteins. *Nucleic Acids Res* **33**: 66-80.
- Rodda, S., S. Sharma, M. Scherer, G. Chapman, and P. Rathjen. 2001. CRTR-1, a developmentally regulated transcriptional repressor related to the CP2 family of transcription factors. *J Biol Chem* **276**: 3324-3332.
- Romier, C., F. Cocchiarella, R. Mantovani, and D. Moras. 2003. The NF-YB/NF-YC structure gives insight into DNA binding and transcription regulation by CCAAT factor NF-Y. *J Biol Chem* **278**: 1336-1345.
- Ronchi, A., M. Bellowini, N. Mongelli, and R. Mantovani. 1995. CCAAT-box binding protein NF-Y (CBF, CP1) recognizes the minor groove and distorts DNA. *Nucleic Acids Res* **23**: 4565-4572.
- Rupp, R. A., Kruse, U., Multhaup, G., Gobel, U., Beyreuther, K., Sippel, A. E. 1990. Chicken NFI/TGGCA proteins are encoded by at least three independent genes: NFI-A, NFI-B and NFI-C with homologues in mammalian genomes. *Nucleic Acids Res* **18**: 2607-2616
- Sinha, S., S.N. Maity, J. Lu, and B. de Crombrugge. 1995. Recombinant rat CBF-C, the third subunit of CBF/NFY, allows formation of a protein-DNA complex with CBF-A and CBF-B and with yeast HAP2 and HAP3. *Proc Natl Acad Sci U S A* **92**: 1624-1628.
- Stefancsik, R. and S. Sarkar. 2003. Relationship between the DNA binding domains of SMAD and NFI/CTF transcription factors defines a new superfamily of genes. *DNA Seq* **14**: 233-239.

- Surdo, P.L., M.J. Bottomley, M. Sattler, and K. Scheffzek. 2003. Crystal structure and nuclear magnetic resonance analyses of the SAND domain from glucocorticoid modulatory element binding protein-1 reveals deoxyribonucleic acid and zinc binding regions. *Mol Endocrinol* **17**: 1283-1295.
- Tahirov, T.H., K. Sato, E. Ichikawa-Iwata, M. Sasaki, T. Inoue-Bungo, M. Shiina, K. Kimura, S. Takata, A. Fujikawa, H. Morii et al. 2002. Mechanism of c-Myb-C/EBP beta cooperation from separated sites on a promoter. *Cell* **108**: 57-70.
- Uv, A.E., C.R. Thompson, and S.J. Bray. 1994. The *Drosophila* tissue-specific factor Grainyhead contains novel DNA-binding and dimerization domains which are conserved in the human protein CP2. *Mol Cell Biol* **14**: 4020-4031.
- van Dongen, M.J., A. Cederberg, P. Carlsson, S. Enerback, and M. Wikstrom. 2000. Solution structure and dynamics of the DNA-binding domain of the adipocyte-transcription factor FREAC-11. *J Mol Biol* **296**: 351-359.
- Vullhorst, D. and A. Buonanno. 2003. Characterization of general transcription factor 3, a transcription factor involved in slow muscle-specific gene expression. *J Biol Chem* **278**: 8370-8379.
- Vullhorst, D. and A. Buonanno. 2005. Multiple GTF2I-like repeats of general transcription factor 3 exhibit DNA binding properties. Evidence for a common origin as a sequence-specific DNA interaction module. *J Biol Chem* **280**: 31722-31731.



**Table S6.** Protein class counts of genes predicted to contain multiple instances of the same DNA-Binding domain

| <b>Protein Group ID</b> | <b>Protein Group Description</b> | <b>Protein Family ID</b> | <b>Protein Family Description</b>  | <b># Genes With Multiple Predicted Instances</b> |
|-------------------------|----------------------------------|--------------------------|------------------------------------|--------------------------------------------------|
| 1.1                     | Helix-Turn-Helix Group           | 100                      | Myb Domain Family                  | 5                                                |
| 1.1                     | Helix-Turn-Helix Group           | 2                        | Homeodomain Family                 | 22                                               |
| 1.2                     | Winged Helix-Turn-Helix          | 101                      | GTF2I Domain Family                | 2                                                |
| 1.2                     | Winged Helix-Turn-Helix          | 15                       | Transcription Factor Family        | 1                                                |
| 2.1                     | Zinc-coordinating Group          | 104                      | GATA Domain Family                 | 5                                                |
| 2.1                     | Zinc-coordinating Group          | 114                      | Non Methyl-CpG-binding CXXC Domain | 1                                                |
| 2.1                     | Zinc-coordinating Group          | 17                       | BetaBetaAlpha-zinc finger Family   | 79                                               |
| 3                       | Zipper-Type Group                | 21                       | Leucine Zipper Family              | 23                                               |
| 4                       | Other Alpha-Helix Group          | 28                       | High Mobility Group (Box)          | 3                                                |
| 5                       | Beta-sheet Group                 | 30                       | TATA box-binding Family            | 1                                                |
| 8                       | Enzyme Group                     | 47                       | DNA Polymerase-Beta Family         | 1                                                |
| 999                     | Unclassified Structure           | 904                      | AT-hook Domain Family              | 2                                                |

**Table S7.** DNA-binding transcription factors predicted to contain two different DNA-binding classes

| Gene ID | Gene Symbol  | Gene Description                                                            | Predicted Protein Group   | Predicted Protein Family              |
|---------|--------------|-----------------------------------------------------------------------------|---------------------------|---------------------------------------|
| 11909   | <i>Atf2</i>  | activating transcription factor 2                                           | Zinc-coordinating Group   | BetaBetaAlpha-zinc finger Family      |
| 11909   | <i>Atf2</i>  | activating transcription factor 2                                           | Zipper-Type Group         | Leucine Zipper Family                 |
| 17190   | <i>Mbd1</i>  | methyl-CpG binding domain protein 1                                         | Zinc-coordinating Group   | Non Methyl-CpG-binding CXXC Domain    |
| 17190   | <i>Mbd1</i>  | methyl-CpG binding domain protein 1                                         | Beta-Hairpin-Ribbon Group | Methyl-CpG-binding domain, MBD Family |
| 19664   | <i>Rbpj</i>  | recombination signal binding protein for immunoglobulin kappa               | Other                     | Beta_Trefoil-like Domain Family       |
| 19664   | <i>Rbpj</i>  | recombination signal binding protein for immunoglobulin kappa J region      | Other                     | DNA-binding LAG-1-like Domain Family  |
| 19668   | <i>Rbpjl</i> | recombination signal binding protein for immunoglobulin kappa J region-like | Other                     | Beta_Trefoil-like Domain Family       |
| 19668   | <i>Rbpjl</i> | recombination signal binding protein for immunoglobulin kappa J region-like | Other                     | DNA-binding LAG-1-like Domain Family  |
| 56218   | <i>Patz1</i> | POZ (BTB) and AT hook containing zinc finger 1                              | Zinc-coordinating Group   | BetaBetaAlpha-zinc finger Family      |
| 56218   | <i>Patz1</i> | POZ (BTB) and AT hook containing zinc finger 1                              | Unclassified Structure    | AT-hook Domain Family                 |

**Table S7.** DNA-binding transcription factors predicted to contain two different DNA-binding classes (continued)

| <b>Gene ID</b> | <b>Gene Symbol</b> | <b>Gene Description</b>                      | <b>Predicted Protein Group</b> | <b>Predicted Protein Family</b>    |
|----------------|--------------------|----------------------------------------------|--------------------------------|------------------------------------|
| 116870         | <i>Mta1</i>        | metastasis associated 1                      | Helix-Turn-Helix Group         | Myb Domain Family                  |
| 116870         | <i>Mta1</i>        | metastasis associated 1                      | Zinc-coordinating Group        | GATA Domain Family                 |
| 223922         | <i>Atf7</i>        | activating transcription factor 7            | Zinc-coordinating Group        | BetaBetaAlpha-zinc finger Family   |
| 223922         | <i>Atf7</i>        | activating transcription factor 7            | Zipper-Type Group              | Leucine Zipper Family              |
| 214162         | <i>Mll1</i>        | myeloid/lymphoid or mixed-lineage leukemia 1 | Zinc-coordinating Group        | Non Methyl-CpG-binding CXXC Domain |
| 214162         | <i>Mll1</i>        | myeloid/lymphoid or mixed-lineage leukemia 1 | Unclassified Structure         | AT-hook Domain Family              |

**Table S8.** DNA-binding transcription factors with no detected DNA-binding domains

| Gene ID | Gene Symbol   | Gene Description                                                     |
|---------|---------------|----------------------------------------------------------------------|
| 106389  | <i>Eaf2</i>   | ELL associated factor 2                                              |
| 232906  | <i>Grff1</i>  | glucocorticoid receptor DNA binding factor 1                         |
| 56461   | <i>Kcnip3</i> | calsenilin, presenilin binding protein, EF hand transcription factor |
| 104338  | <i>Mynf1</i>  | myeloid nuclear factor 1                                             |
| 11614   | <i>Nr0b1</i>  | nuclear receptor subfamily 0, group B, member 1                      |
| 74451   | <i>Pgs1</i>   | phosphatidylglycerophosphate synthase 1                              |
| 50907   | <i>Preb</i>   | prolactin regulatory element binding                                 |
| 79401   | <i>Spz1</i>   | spermatogenic Zip 1                                                  |
| 21411   | <i>Tcf20</i>  | transcription factor 20                                              |
| 57432   | <i>Zc3h8</i>  | zinc finger CCCH type containing 8                                   |

**Table S9.** DNA-binding transcription factors with no detected Protein Family class

| Gene ID | Gene Symbol    | Gene Description                                       | Predicted Protein Group |
|---------|----------------|--------------------------------------------------------|-------------------------|
| 11545   | <i>Parp1</i>   | poly (ADP-ribose) polymerase family, member 1          | Zinc-coordinating Group |
| 14056   | <i>Ezh2</i>    | enhancer of zeste homolog 2 (Drosophila)               | Helix-Turn-Helix Group  |
| 21804   | <i>Tgfb1i1</i> | transforming growth factor beta 1 induced transcript 1 | Zinc-coordinating Group |
| 245583  | <i>Tgif2lx</i> | TGFB-induced factor homeobox 2-like, X-linked          | Helix-Turn-Helix Group  |

**Table S10.** Single-stranded DNA-binding transcription factors

| <b>Gene ID</b> | <b>Gene Symbol</b> | <b>Description</b>                                   |
|----------------|--------------------|------------------------------------------------------|
| 245000         | <i>Atr</i>         | ataxia telangiectasia and rad3 related               |
| 13194          | <i>Ddb1</i>        | damage specific DNA binding protein 1                |
| 107986         | <i>Ddb2</i>        | damage specific DNA binding protein 2                |
| 15384          | <i>Hnrpab</i>      | heterogeneous nuclear ribonucleoprotein A/B          |
| 50926          | <i>Hnrpdl</i>      | heterogeneous nuclear ribonucleoprotein D-like       |
| 15387          | <i>Hnrpk</i>       | heterogeneous nuclear ribonucleoprotein K            |
| 17876          | <i>Myef2</i>       | myelin basic protein expression factor 2, repressor  |
| 74164          | <i>Nfx1</i>        | nuclear transcription factor, X-box binding 1        |
| 18148          | <i>Npm1</i>        | nucleophosmin 1                                      |
| 23983          | <i>Pcbp1</i>       | poly(rC) binding protein 1                           |
| 18521          | <i>Pcbp2</i>       | poly(rC) binding protein 2                           |
| 19290          | <i>Pura</i>        | purine rich element binding protein A                |
| 19291          | <i>Purb</i>        | purine rich element binding protein B                |
| 56381          | <i>Spn</i>         | SPEN homolog, transcriptional regulator (Drosophila) |
| 106021         | <i>Topors</i>      | topoisomerase I binding, arginine/serine-rich        |
| 22608          | <i>Ybx1</i>        | Y box protein 1                                      |

**Table S11.** Summary of curated TFCat TFs in Gene Ontology (GO)

| <b>GO Annotation Type</b>                                                                                                                                                                              | <b>Molecular Function Sub-Tree</b> |
|--------------------------------------------------------------------------------------------------------------------------------------------------------------------------------------------------------|------------------------------------|
| Excluding GO annotations types:<br>IEA: Inferred from Electronic Annotations<br>ISS: Inferred from Sequence or Structural Similarity Annotations<br>RCA: Inferred from Reviewed Computational Analysis | 343 / 882                          |
| All GO annotation types (including IEA, ISS, RCA)                                                                                                                                                      | 409 / 882                          |

**Table S12.** Comparison summary of TFCat classified HMM DNA-binding domains with the DBD database (DBDdb) resource

|                         | <b>Found in DBD</b> | <b>Not found in DBD</b> |
|-------------------------|---------------------|-------------------------|
| Classified in TFCat     | 116                 | 16                      |
| Not classified in TFCat | 68                  |                         |

**Table S13.** Superfamily DNA binding domain list comparison with DBD Database (DBDdb) resource

| Model ID | Domain Name                                              | In DBD | In TFCat |
|----------|----------------------------------------------------------|--------|----------|
| 39848    | A DNA-binding domain in eukaryotic transcription factors | Y      | Y        |
| 43644    | A DNA-binding domain in eukaryotic transcription factors | Y      | Y        |
| 35817    | ARID-like                                                |        | Y        |
| 43437    | ARID-like                                                |        | Y        |
| 34823    | C2H2 and C2HC zinc fingers                               | Y      | Y        |
| 34824    | C2H2 and C2HC zinc fingers                               | Y      |          |
| 34825    | C2H2 and C2HC zinc fingers                               | Y      | Y        |
| 34826    | C2H2 and C2HC zinc fingers                               | Y      | Y        |
| 35441    | C2H2 and C2HC zinc fingers                               | Y      | Y        |
| 35556    | C2H2 and C2HC zinc fingers                               | Y      | Y        |
| 37351    | C2H2 and C2HC zinc fingers                               | Y      | Y        |
| 37782    | C2H2 and C2HC zinc fingers                               | Y      | Y        |
| 40545    | C2H2 and C2HC zinc fingers                               | Y      | Y        |
| 41311    | C2H2 and C2HC zinc fingers                               | Y      | Y        |
| 41429    | C2H2 and C2HC zinc fingers                               | Y      | Y        |
| 42182    | C2H2 and C2HC zinc fingers                               | Y      | Y        |
| 42220    | C2H2 and C2HC zinc fingers                               | Y      |          |
| 43688    | C2H2 and C2HC zinc fingers                               | Y      |          |
| 43689    | C2H2 and C2HC zinc fingers                               | Y      |          |
| 43730    | C2H2 and C2HC zinc fingers                               | Y      | Y        |
| 43976    | C2H2 and C2HC zinc fingers                               | Y      | Y        |
| 43977    | C2H2 and C2HC zinc fingers                               | Y      |          |
| 43978    | C2H2 and C2HC zinc fingers                               | Y      | Y        |
| 43982    | C2H2 and C2HC zinc fingers                               | Y      |          |
| 43983    | C2H2 and C2HC zinc fingers                               | Y      |          |
| 43984    | C2H2 and C2HC zinc fingers                               | Y      |          |
| 44259    | C2H2 and C2HC zinc fingers                               | Y      |          |
| 44260    | C2H2 and C2HC zinc fingers                               | Y      |          |
| 44261    | C2H2 and C2HC zinc fingers                               | Y      | Y        |
| 45110    | C2H2 and C2HC zinc fingers                               | Y      | Y        |
| 45118    | C2H2 and C2HC zinc fingers                               | Y      |          |
| 45151    | C2H2 and C2HC zinc fingers                               | Y      |          |
| 45152    | C2H2 and C2HC zinc fingers                               | Y      | Y        |
| 45249    | C2H2 and C2HC zinc fingers                               | Y      | Y        |
| 45250    | C2H2 and C2HC zinc fingers                               | Y      |          |
| 45293    | C2H2 and C2HC zinc fingers                               | Y      | Y        |
| 45294    | C2H2 and C2HC zinc fingers                               | Y      |          |
| 45295    | C2H2 and C2HC zinc fingers                               | Y      |          |
| 45296    | C2H2 and C2HC zinc fingers                               | Y      |          |
| 45297    | C2H2 and C2HC zinc fingers                               | Y      | Y        |
| 45613    | C2H2 and C2HC zinc fingers                               | Y      |          |
| 45631    | C2H2 and C2HC zinc fingers                               | Y      | Y        |
| 42508    | CCHHC domain                                             | Y      | Y        |
| 40609    | Cysteine-rich DNA binding domain, (DM domain)            | Y      |          |

**Table S13.** Superfamily DNA binding domain list (continued)

| Model ID | Domain Name                                         | In DBD | In TFCat |
|----------|-----------------------------------------------------|--------|----------|
| 36316    | DNA-binding domain                                  | Y      | Y        |
| 42826    | DNA-binding domain                                  | Y      |          |
| 41800    | GCM domain                                          | Y      | Y        |
| 36002    | Glucocorticoid receptor-like (DNA-binding domain)   | Y      | Y        |
| 36583    | Glucocorticoid receptor-like (DNA-binding domain)   | Y      |          |
| 40006    | Glucocorticoid receptor-like (DNA-binding domain)   | Y      |          |
| 40440    | Glucocorticoid receptor-like (DNA-binding domain)   | Y      |          |
| 40589    | Glucocorticoid receptor-like (DNA-binding domain) Y | Y      |          |
| 45290    | Glucocorticoid receptor-like (DNA-binding domain)   | Y      | Y        |
| 45386    | Glucocorticoid receptor-like (DNA-binding domain)   | Y      | Y        |
| 45592    | Glucocorticoid receptor-like (DNA-binding domain)   | Y      | Y        |
| 34803    | HLH, helix-loop-helix DNA-binding domain            | Y      | Y        |
| 35101    | HLH, helix-loop-helix DNA-binding domain            | Y      | Y        |
| 35112    | HLH, helix-loop-helix DNA-binding domain            | Y      | Y        |
| 35113    | HLH, helix-loop-helix DNA-binding domain            | Y      | Y        |
| 38629    | HLH, helix-loop-helix DNA-binding domain            | Y      | Y        |
| 40898    | HLH, helix-loop-helix DNA-binding domain            | Y      | Y        |
| 41437    | HLH, helix-loop-helix DNA-binding domain            | Y      | Y        |
| 41452    | HLH, helix-loop-helix DNA-binding domain            | Y      | Y        |
| 43065    | HLH, helix-loop-helix DNA-binding domain            | Y      | Y        |
| 34886    | Homeodomain-like                                    | Y      | Y        |
| 34887    | Homeodomain-like                                    | Y      |          |
| 35079    | Homeodomain-like                                    | Y      | Y        |
| 35379    | Homeodomain-like                                    | Y      | Y        |
| 35402    | Homeodomain-like                                    | Y      | Y        |
| 35403    | Homeodomain-like                                    | Y      |          |
| 35741    | Homeodomain-like                                    | Y      |          |
| 36604    | Homeodomain-like                                    | Y      |          |
| 37777    | Homeodomain-like                                    | Y      |          |
| 37778    | Homeodomain-like                                    | Y      | Y        |
| 38474    | Homeodomain-like                                    | Y      |          |
| 38986    | Homeodomain-like                                    | Y      | Y        |
| 40485    | Homeodomain-like                                    | Y      | Y        |
| 40874    | Homeodomain-like                                    | Y      | Y        |
| 40945    | Homeodomain-like                                    | Y      |          |
| 41016    | Homeodomain-like                                    | Y      | Y        |
| 42267    | Homeodomain-like                                    | Y      | Y        |
| 42468    | Homeodomain-like                                    | Y      | Y        |
| 44368    | Homeodomain-like                                    | Y      | Y        |
| 44899    | Homeodomain-like                                    | Y      |          |
| 45311    | Homeodomain-like                                    | Y      |          |
| 45348    | Homeodomain-like                                    | Y      | Y        |
| 45634    | Homeodomain-like                                    | Y      |          |



**Table S13.** Superfamily DNA binding domain list (continued)

| Model ID | Domain Name                                     | In DBD | In TFCat |
|----------|-------------------------------------------------|--------|----------|
| 35201    | lambda repressor-like DNA-binding domains       | Y      | Y        |
| 36752    | lambda repressor-like DNA-binding domains       | Y      | Y        |
| 38966    | lambda repressor-like DNA-binding domains       | Y      | Y        |
| 43707    | lambda repressor-like DNA-binding domains       | Y      |          |
| 37961    | Nucleic acid-binding proteins                   | Y      |          |
| 38488    | Nucleic acid-binding proteins                   | Y      |          |
| 40961    | Nucleic acid-binding proteins                   | Y      |          |
| 34796    | p53-like transcription factors                  | Y      | Y        |
| 34855    | p53-like transcription factors                  | Y      | Y        |
| 35512    | p53-like transcription factors                  | Y      | Y        |
| 35525    | p53-like transcription factors                  | Y      | Y        |
| 36065    | p53-like transcription factors                  | Y      | Y        |
| 38119    | p53-like transcription factors                  | Y      | Y        |
| 38434    | p53-like transcription factors                  | Y      | Y        |
| 39062    | p53-like transcription factors                  | Y      | Y        |
| 41017    | p53-like transcription factors                  | Y      |          |
| 41370    | p53-like transcription factors                  | Y      | Y        |
| 44112    | p53-like transcription factors                  | Y      | Y        |
| 45029    | p53-like transcription factors                  | Y      | Y        |
| 45080    | p53-like transcription factors                  | Y      | Y        |
| 38425    | SAND domain-like                                | Y      | Y        |
| 41973    | SAND domain-like                                | Y      | Y        |
| 44332    | SAND domain-like                                | Y      |          |
| 40928    | SMAD MH1 domain                                 | Y      | Y        |
| 41015    | SRF-like                                        | Y      |          |
| 41235    | SRF-like                                        | Y      | Y        |
| 43734    | SRF-like                                        | Y      | Y        |
| 35524    | STAT                                            | Y      | Y        |
| 35881    | Transcriptional factor tubby, C-terminal domain | Y      |          |
| 35957    | Winged helix DNA-binding domain                 | Y      | Y        |
| 35958    | Winged helix DNA-binding domain                 | Y      | Y        |
| 36285    | Winged helix DNA-binding domain                 | Y      |          |
| 36540    | Winged helix DNA-binding domain                 | Y      | Y        |
| 36707    | Winged helix DNA-binding domain                 | Y      |          |
| 37479    | Winged helix DNA-binding domain                 | Y      |          |
| 38516    | Winged helix DNA-binding domain                 | Y      | Y        |
| 38616    | Winged helix DNA-binding domain                 | Y      | Y        |
| 38992    | Winged helix DNA-binding domain                 | Y      | Y        |
| 39808    | Winged helix DNA-binding domain                 | Y      |          |
| 40891    | Winged helix DNA-binding domain                 | Y      | Y        |
| 45310    | Winged helix DNA-binding domain                 | Y      | Y        |
| 45339    | Winged helix DNA-binding domain                 | Y      | Y        |

**Table S14.** PFAM DNA binding domain list comparison with DBD Database (DBDdb)

| Model ID | Model Name      | Model Description                                                        | In DBD | In TFCat |
|----------|-----------------|--------------------------------------------------------------------------|--------|----------|
| PF05110  | AF-4            | AF-4 proto-oncoprotein                                                   | Y      | Y        |
| PF01586  | Basic           | Myogenic Basic domain                                                    | Y      |          |
| PF00170  | bZIP_1          | bZIP transcription factor                                                | Y      | Y        |
| PF07716  | bZIP_2          | Basic region leucine zipper – bZIP_2                                     | Y      | Y        |
| PF03131  | bZIP_Maf        | bZIP Maf transcription factor                                            | Y      | Y        |
| PF02045  | CBFB_NFYA       | CCAAT-binding transcription factor (CBF-B/NF-YA) subunit B               | Y      | Y        |
| PF00808  | CBFD_NFYB_HMF   | <b>Histone-like transcription factor (CBF/NF-Y) and archaeal histone</b> |        | Y        |
| PF03859  | CG-1            | CG-1 domain                                                              | Y      |          |
| PF06573  | Churchill       | Churchill protein                                                        | Y      |          |
| PF04516  | CP2             | CP2 transcription factor                                                 | Y      | Y        |
| PF00313  | CSD             | 'Cold-shock' DNA-binding domain                                          | Y      |          |
| PF02376  | CUT             | CUT domain                                                               | Y      | Y        |
| PF02791  | DDT             | DDT domain                                                               | Y      | Y        |
| PF00751  | DM              | DM DNA binding domain                                                    | Y      |          |
| PF02319  | E2F_TDP         | E2F/DP family winged-helix DNA-binding domain                            | Y      | Y        |
| PF00178  | Ets             | Ets-domain                                                               | Y      | Y        |
| PF06818  | Fez1            | Fez1                                                                     | Y      |          |
| PF00250  | Fork_head       | Fork head domain                                                         | Y      | Y        |
| PF00320  | GATA            | GATA zinc finger                                                         | Y      | Y        |
| PF03615  | GCM             | GCM motif protein                                                        | Y      | Y        |
| PF06320  | GCN5L1          | GCN5-like protein 1 (GCN5L1)                                             | Y      |          |
| PF00010  | HLH             | Helix-loop-helix DNA-binding domain                                      | Y      | Y        |
| PF00046  | Homeobox        | Homeobox domain                                                          | Y      | Y        |
| PF00447  | HSF_DNA-bind    | HSF-type DNA-binding                                                     | Y      | Y        |
| PF08279  | HTH_11          | HTH domain                                                               | Y      |          |
| PF01381  | HTH_3           | Helix-turn-helix                                                         | Y      |          |
| PF05225  | HTH_psq         | helix-turn-helix, Psq domain                                             | Y      | Y        |
| PF00605  | IRF             | Interferon regulatory factor transcription factor                        | Y      | Y        |
| PF01056  | Myc_N           | Myc amino-terminal region                                                | Y      |          |
| PF05224  | NDT80_PhoG      | NDT80 / PhoG like DNA-binding family                                     | Y      |          |
| PF04054  | Not1            | CCR4-Not complex component, Not1                                         | Y      |          |
| PF00870  | P53             | P53 DNA-binding domain                                                   | Y      | Y        |
| PF00292  | PAX             | 'Paired box' domain                                                      | Y      | Y        |
| PF00157  | Pou             | Pou domain - N-terminal to homeobox domain                               | Y      | Y        |
| PF05044  | Prox1           | Homeobox prospero-like protein (PROX1)                                   | Y      |          |
| PF02257  | RFX_DNA_binding | RFX DNA-binding domain                                                   | Y      | Y        |
| PF00554  | RHD             | Rel homology domain (RHD)                                                | Y      | Y        |
| PF00853  | Runt            | Runt domain                                                              | Y      | Y        |
| PF01342  | SAND            | SAND domain                                                              | Y      | Y        |
| PF03343  | SART-1          | SART-1 family                                                            | Y      |          |
| PF07093  | SGT1            | SGT1 protein                                                             | Y      |          |
| PF00319  | SRF-TF          | SRF-type transcription factor (DNA-binding and dimerisation domain)      | Y      | Y        |
| PF02864  | STAT_bind       | STAT protein, DNA binding domain                                         | Y      | Y        |

**Table S14.** PFAM DNA binding domain list comparison with DBDdb (continued)

| Model ID | Model Name      | Model Description                                         | In DBD | In TFCat |
|----------|-----------------|-----------------------------------------------------------|--------|----------|
| PF00907  | T-box           | T-box                                                     | Y      | Y        |
| PF01285  | TEA             | TEA/ATTS domain family                                    | Y      | Y        |
| PF03299  | TF_AP-2         | Transcription factor AP-2                                 | Y      | Y        |
| PF01167  | Tub             | Tub family                                                | Y      |          |
| PF05764  | YL1             | YL1 nuclear protein                                       | Y      |          |
| PF01754  | zf-A20          | A20-like zinc finger                                      | Y      |          |
| PF02892  | zf-BED          | BED zinc finger                                           | Y      |          |
| PF00096  | zf-C2H2         | Zinc finger, C2H2 type                                    | Y      | Y        |
| PF01530  | zf-C2HC         | Zinc finger, C2HC type                                    | Y      | Y        |
| PF00105  | zf-C4           | Zinc finger, C4 type (two domains)                        | Y      | Y        |
| PF02928  | zf-C5HC2        | C5HC2 zinc finger                                         | Y      |          |
| PF06839  | zf-GRF          | GRF zinc finger                                           | Y      |          |
| PF02891  | zf-MIZ          | MIZ zinc finger                                           | Y      |          |
| PF01422  | zf-NF-X1        | NF-X1 type zinc finger                                    | Y      |          |
| PF02135  | zf-TAZ          | TAZ zinc finger                                           | Y      |          |
| PF01388  | ARID            | ARID/BRIGHT DNA binding domain                            |        | Y        |
| PF02178  | AT_hook         | AT hook motif                                             |        | Y        |
| PF09270  | Beta-trefoil    | Beta-trefoil                                              |        | Y        |
| PF00859  | CTF_NF1         | CTF/NF-I family transcription modulation region           |        | Y        |
| PF02946  | GTF2I           | GTF2I-like repeat                                         |        | Y        |
| PF00505  | HMG_box         | HMG (high mobility group) box                             |        | Y        |
| PF09271  | LAG1-DNAbind    | LAG1, DNA binding                                         |        | Y        |
| PF01429  | MBD             | Methyl-CpG binding domain                                 |        | Y        |
| PF03165  | MH1             | MH1 domain                                                |        | Y        |
| PF00249  | Myb_DNA-binding | Myb-like DNA-binding domain                               |        | Y        |
| PF09111  | SLIDE           | SLIDE                                                     |        | Y        |
| PF00352  | TBP             | Transcription factor TFIID (or TATA-binding protein, TBP) |        | Y        |
| PF03529  | TF_Otx          | Otx1 transcription factor                                 |        | Y        |
| PF02008  | zf-CXXC         | CXXC zinc finger domain                                   |        | Y        |

**Table S15.** Fox family gene test set

| <b>Gene ID</b> | <b>Gene Symbol</b> | <b>Gene Description</b> |
|----------------|--------------------|-------------------------|
| 15375          | Foxa1              | forkhead box A1         |
| 15376          | Foxa2              | forkhead box A2         |
| 15377          | Foxa3              | forkhead box A3         |
| 64290          | Foxb1              | forkhead box B1         |
| 14240          | Foxb2              | forkhead box B2         |
| 17300          | Foxc1              | forkhead box C1         |
| 14234          | Foxc2              | forkhead box C2         |
| 15229          | Foxd1              | forkhead box D1         |
| 17301          | Foxd2              | forkhead box D2         |
| 15221          | Foxd3              | forkhead box D3         |
| 14237          | Foxd4              | forkhead box D4         |
| 110805         | Foxe1              | forkhead box E1         |
| 30923          | Foxe3              | forkhead box E3         |
| 15227          | Foxf1a             | forkhead box F1a        |
| 14238          | Foxf2              | forkhead box F2         |
| 15228          | Foxg1              | forkhead box G1         |
| 14106          | Foxh1              | forkhead box H1         |
| 14233          | Foxi1              | forkhead box I1         |
| 270004         | Foxi2              | forkhead box I2         |
| 15223          | Foxj1              | forkhead box J1         |
| 60611          | Foxj2              | forkhead box J2         |
| 230700         | Foxj3              | forkhead box J3         |
| 17425          | Foxk1              | forkhead box K1         |
| 68837          | Foxk2              | forkhead box K2         |
| 14241          | Foxl1              | forkhead box L1         |
| 26927          | Foxl2              | forkhead box L2         |
| 14235          | Foxm1              | forkhead box M1         |
| 15218          | Foxn1              | forkhead box N1         |
| 14236          | Foxn2              | forkhead box N2         |
| 71375          | Foxn3              | forkhead box N3         |
| 116810         | Foxn4              | forkhead box N4         |
| 56458          | Foxo1              | forkhead box O1         |
| 56484          | Foxo3a             | forkhead box O3a        |
| 54601          | Foxo4              | forkhead box O4         |
| 329934         | Foxo6              | forkhead box O6         |
| 108655         | Foxp1              | forkhead box P1         |
| 114142         | Foxp2              | forkhead box P2         |
| 20371          | Foxp3              | forkhead box P3         |
| 74123          | Foxp4              | forkhead box P4         |
| 15220          | Foxq1              | forkhead box Q1         |

**Table S16.** Sox family gene test set

| <b>Gene ID</b> | <b>Gene Symbol</b> | <b>Gene Description</b>         |
|----------------|--------------------|---------------------------------|
| 20665          | Sox10              | SRY-box containing gene 10      |
| 20666          | Sox11              | SRY-box containing gene 11      |
| 20664          | Sox1               | SRY-box containing gene 1       |
| 20667          | Sox12              | SRY-box containing gene 12      |
| 20668          | Sox13              | SRY-box containing gene 13      |
| 20669          | Sox14              | SRY-box containing gene 14      |
| 20670          | Sox15              | SRY-box containing gene 15      |
| 20671          | Sox17              | SRY-box containing gene 17      |
| 20672          | Sox18              | SRY-box containing gene 18      |
| 223227         | Sox21              | SRY-box containing gene 21      |
| 20674          | Sox2               | SRY-box containing gene 2       |
| 214105         | Sox30              | SRY-box containing gene 30      |
| 20675          | Sox3               | SRY-box containing gene 3       |
| 20677          | Sox4               | SRY-box containing gene 4       |
| 20678          | Sox5               | SRY-box containing gene 5       |
| 20679          | Sox6               | SRY-box containing gene 6       |
| 20680          | Sox7               | SRY-box containing gene 7       |
| 20681          | Sox8               | SRY-box containing gene 8       |
| 20682          | Sox9               | SRY-box containing gene 9       |
| 21674          | Sry                | sex determining region of Chr Y |

## Additional Data File 1: Figures

**Figure S1.** Overlap of initial datasets. The gene identifiers were evaluated for overlap in both the Union of Putative TFs (UPTF) (Venn diagram Figure S1 Panel A) and Transcription Factor Candidates (TFC) (Venn diagram Figure S1 Panel B) sets.

A.

UPTF Dataset Overlap

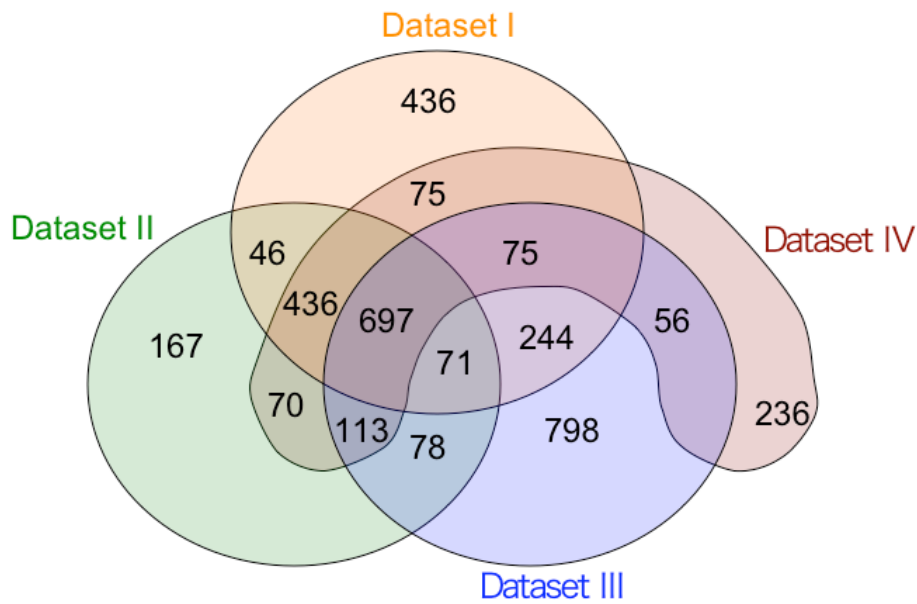

B.

Dataset Overlap in TFC Set

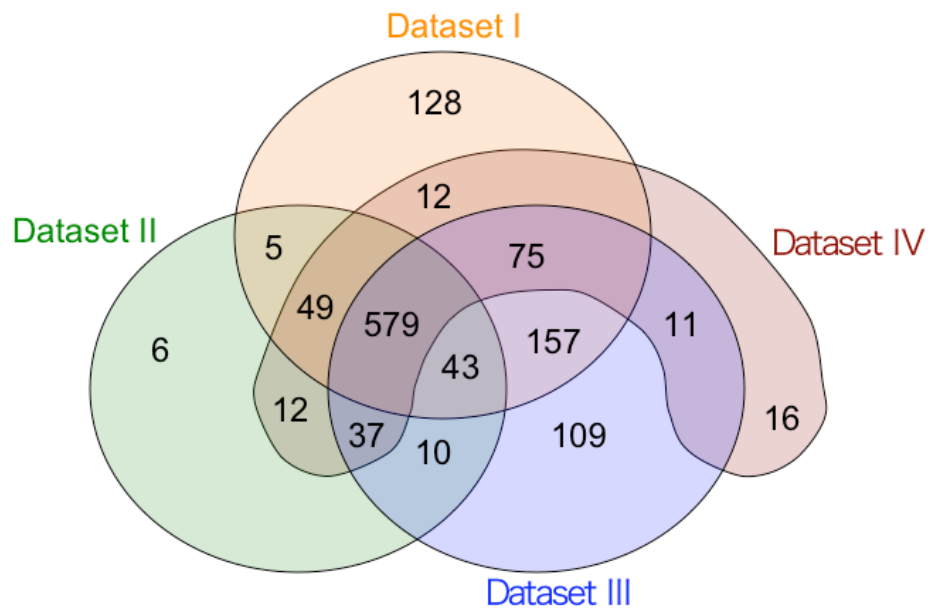

**Figure S2.** Analysis of cluster pruning methods using the Fox test set: plots of cluster sensitivity (proportion of members of the Fox test set in a cluster), cluster specificity (number of cluster members that are members of the Fox test set), and cluster size across increasing  $l'_s$  derived from two different pruning methods. Each line in a panel represents the evaluation of one cluster containing one or more Fox test set genes. Analysis for each specific cluster is represented by the same line color and point symbol combination across all plots in the test set evaluation (some line attributes cannot be easily distinguished when they overlap on a plot). Panel A: Clusters sensitivity values for Fox clusters across increasing  $l'_s$  when clusters are pruned using only  $l'_s$  thresholds (x-axis). Panel B: Cluster specificity values for Fox clusters across increasing  $l'_s$  when clusters are pruned using only  $l'_s$  value thresholds. Panel C: Resulting cluster sizes (cardinalities) for Fox clusters across increasing  $l'_s$  when clusters are pruned using only  $l'_s$  value thresholds. Panel D: Cluster sensitivity values for Fox clusters across increasing  $l'_s$  (x-axis) when clusters are pruned using domain-matching as a primary criteria and  $l'_s$  thresholds applied secondarily when domain matching criteria is not satisfied. Panel E: Cluster specificity values for Fox clusters across increasing  $l'_s$  when clusters are pruned using domain-matching as a primary criteria and  $l'_s$  thresholds applied secondarily when domain matching criteria is not satisfied. Panel F: Resulting cluster sizes for Fox clusters across increasing  $l'_s$  when clusters are pruned using domain-matching as a primary criteria and  $l'_s$  thresholds applied secondarily when domain matching criteria is not satisfied.

A.

**IPRIME-only Pruning Method  
Cluster Sensitivity: FOX TF Clusters**

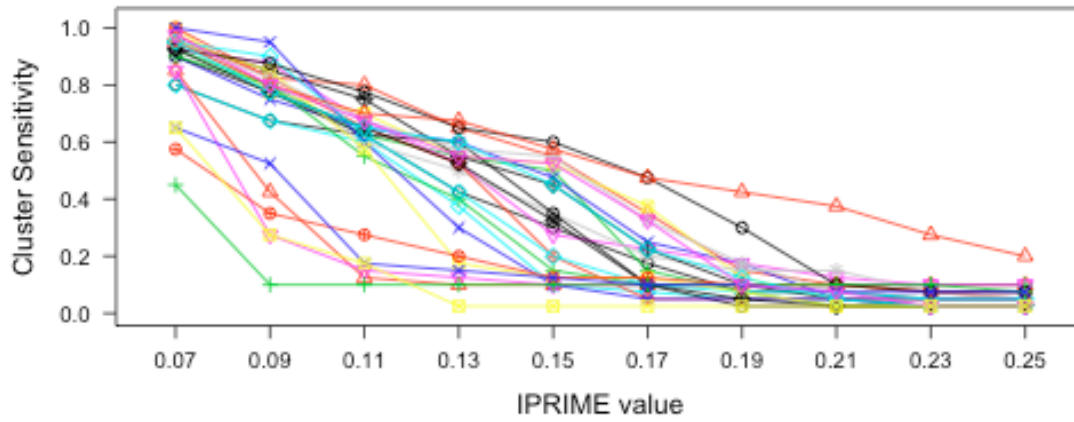

B.

**IPRIME-only Pruning Method  
Cluster Specificity: FOX TF Clusters**

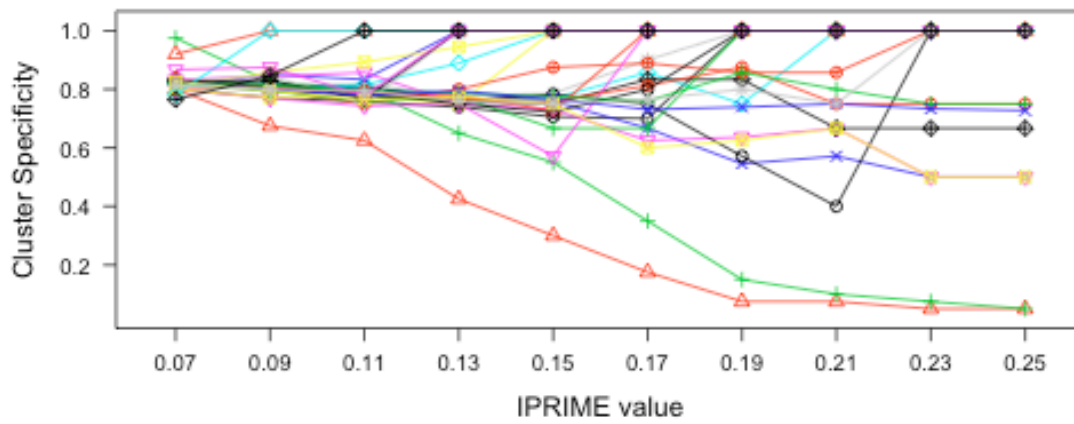

C.

**IPRIME-only Pruning Method  
Cluster Size: FOX TF Clusters**

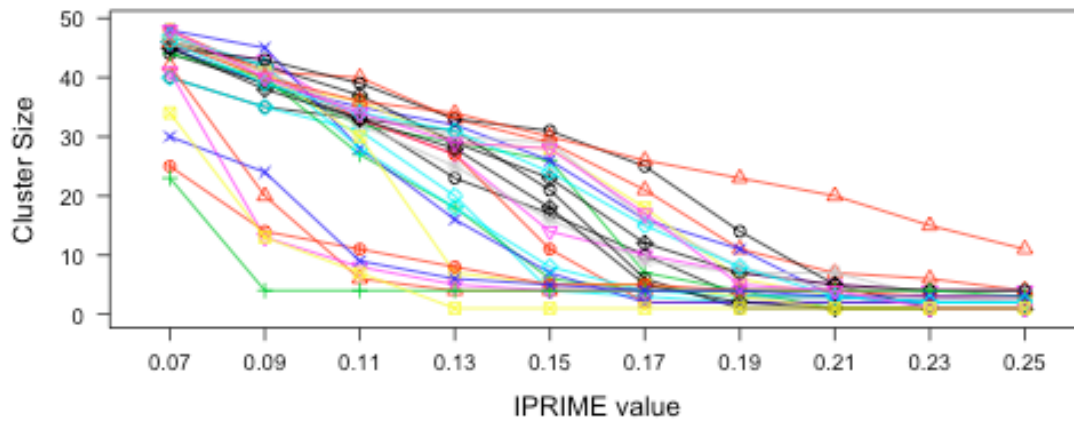



**Domain-based Pruning Method  
Cluster Sensitivity: FOX TF Clusters**

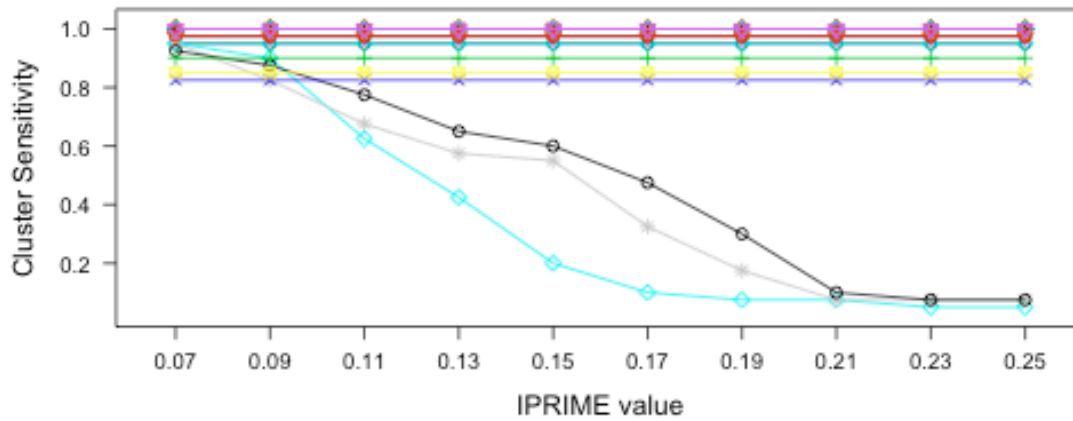

**Domain-based Pruning Method  
Cluster Specificity: FOX TF Clusters**

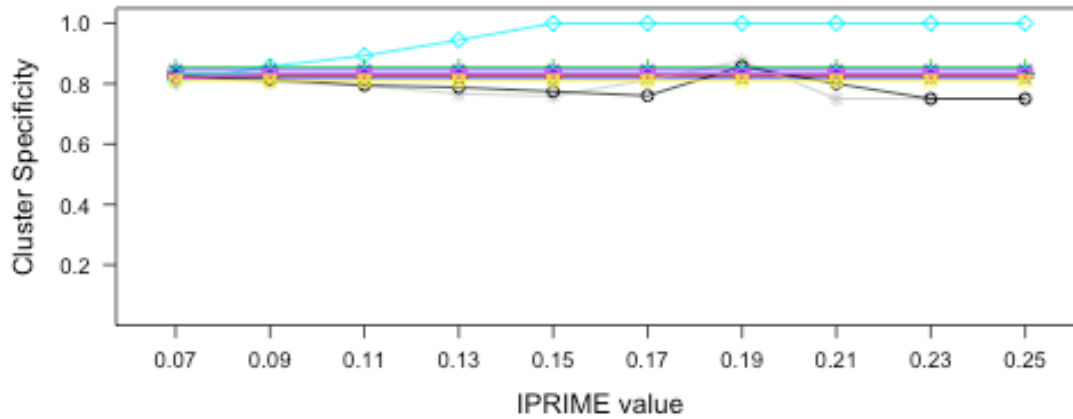

**Domain-based Pruning Method  
Cluster Size: FOX TF Clusters**

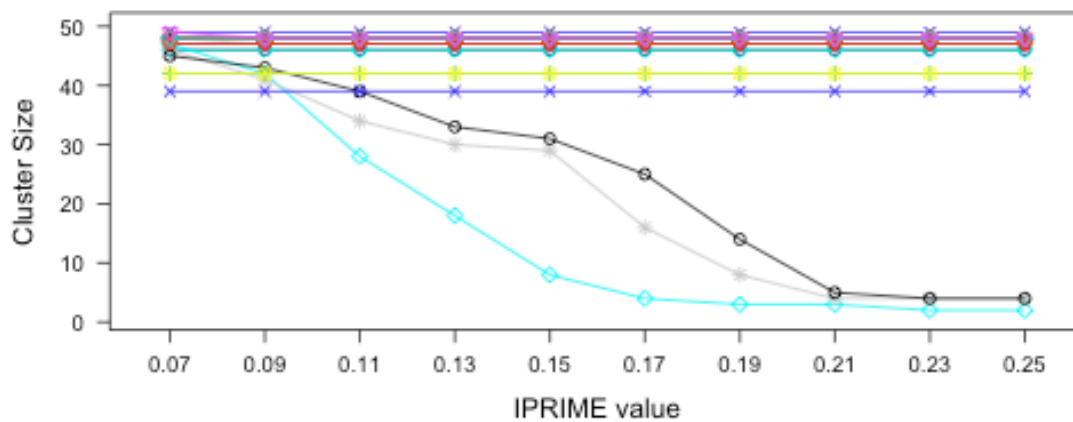

**Figure S3.** Analysis of cluster pruning methods using the Sox test set: plots of cluster sensitivity (proportion of members of the Sox test set in a cluster), cluster specificity (number of cluster members that are members of the Sox test set), and cluster size across increasing  $l'_s$  derived from two different pruning methods. Each line in a panel represents the evaluation of one cluster containing one or more Sox test set genes. Analysis for each specific cluster is represented by the same line color and point symbol combination across all plots in the test set evaluation (some line attributes cannot be easily distinguished when they overlap on a plot). Panel A: Clusters sensitivity values for Sox clusters across increasing  $l'_s$  when clusters are pruned using only  $l'_s$  thresholds (x-axis). Panel B: Cluster specificity values for Sox clusters across increasing  $l'_s$  when clusters are pruned using only  $l'_s$  value thresholds. Panel C: Resulting cluster sizes (cardinalities) for Sox clusters across increasing  $l'_s$  when clusters are pruned using only  $l'_s$  value thresholds. Panel D: Cluster sensitivity values for Sox clusters across increasing  $l'_s$  when clusters are pruned using domain-matching as a primary criteria and  $l'_s$  thresholds applied secondarily when domain matching criteria is not satisfied. Panel E: Cluster specificity values for Sox clusters across increasing  $l'_s$  when clusters are pruned using domain-matching as a primary criteria and  $l'_s$  thresholds applied secondarily when domain matching criteria is not satisfied. Panel F: Resulting cluster sizes for Sox clusters across increasing  $l'_s$  when clusters are pruned using domain-matching as a primary criteria and  $l'_s$  thresholds applied secondarily when domain matching criteria is not satisfied.

A.

**IPRIME-only Pruning Method  
Cluster Sensitivity: SOX TF Clusters**

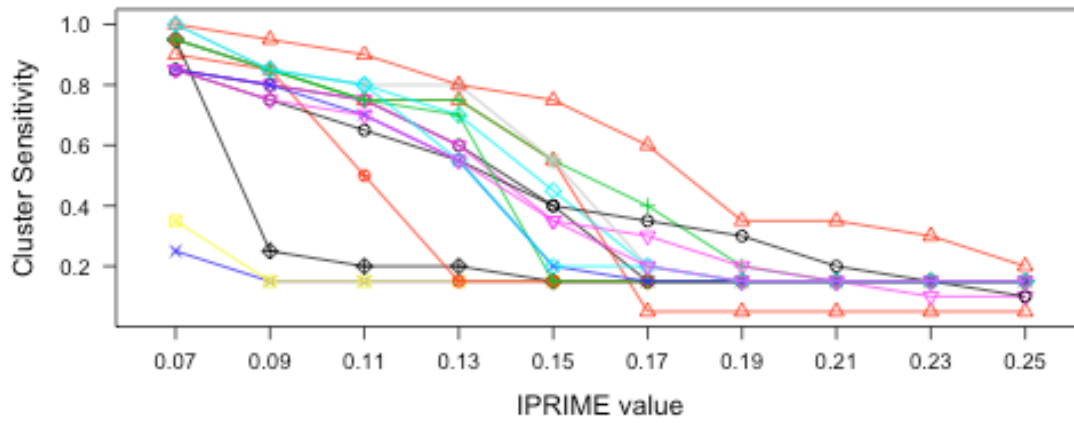

B.

**IPRIME-only Pruning Method  
Cluster Specificity: SOX TF Clusters**

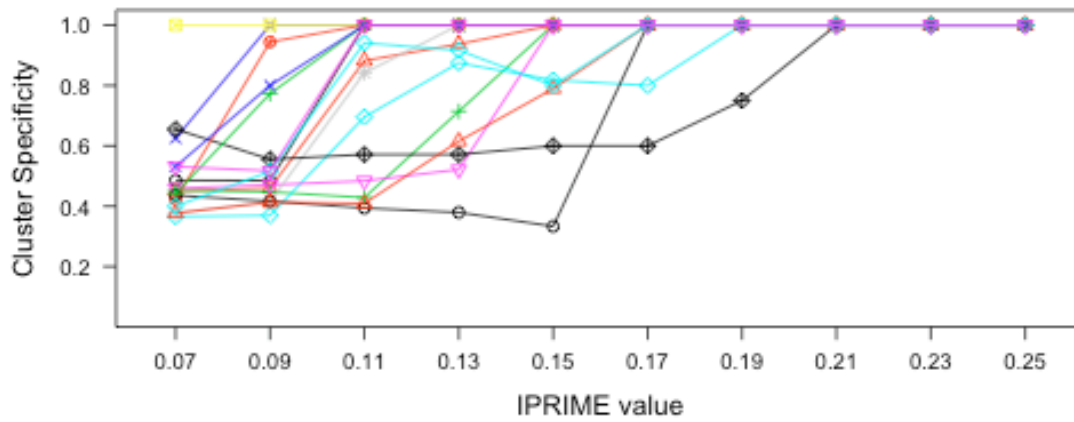

C.

**IPRIME-only Pruning Method  
Cluster Size: SOX TF Clusters**

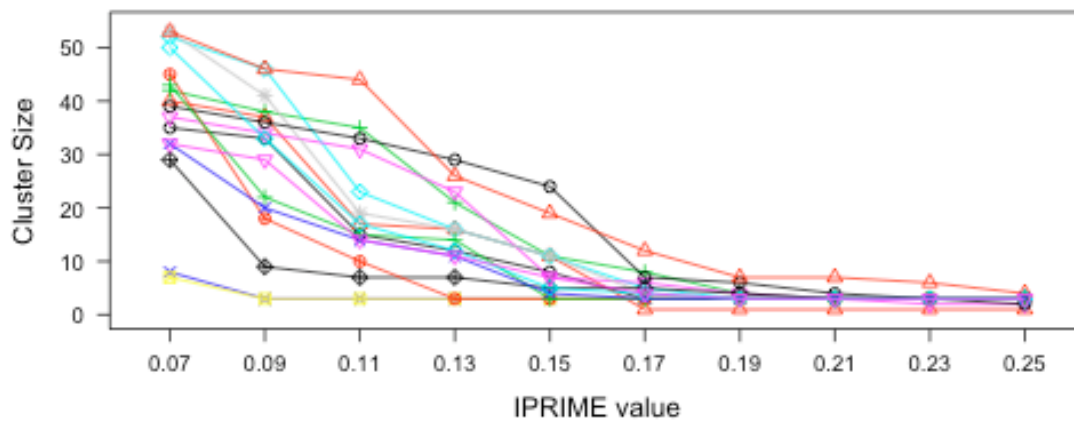

D.

**Domain-based Pruning Method**  
**Cluster Sensitivity: SOX TF Clusters**

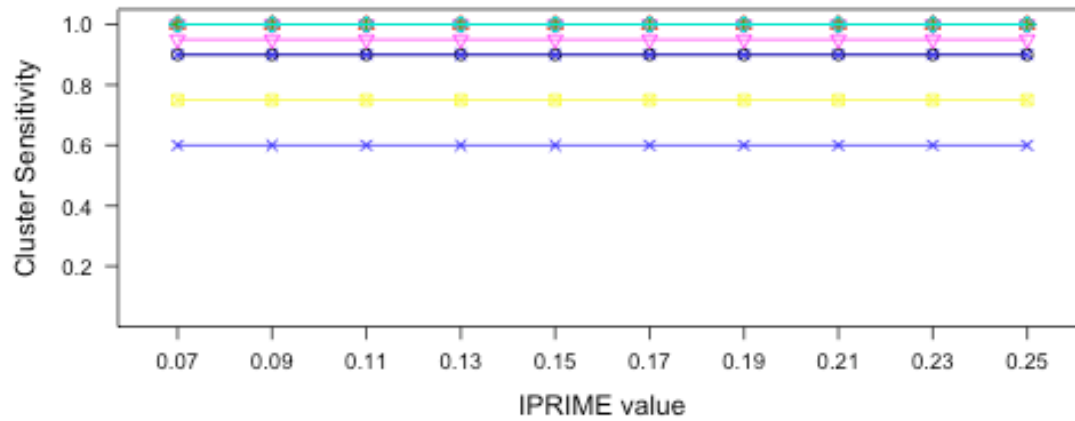

E.

**Domain-based Pruning Method**  
**Cluster Specificity: SOX TF Clusters**

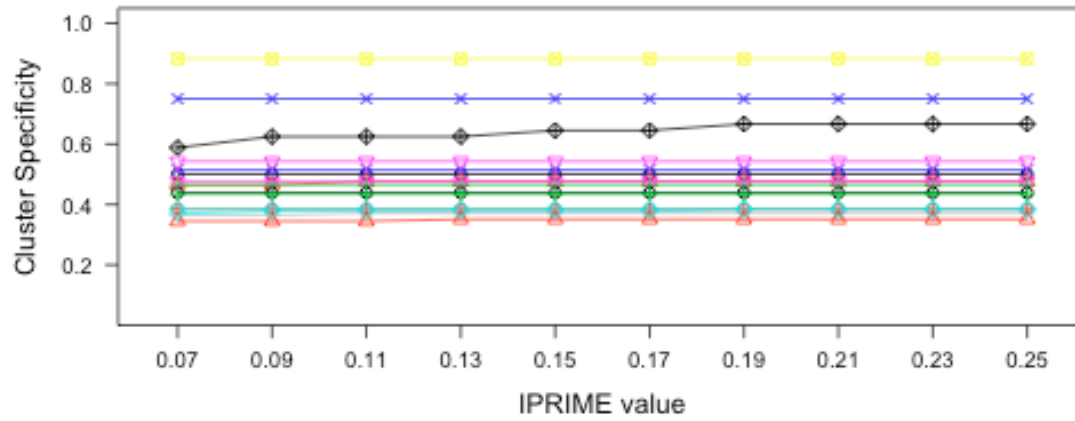

F.

**Domain-based Pruning Method**  
**Cluster Size: SOX TF Clusters**

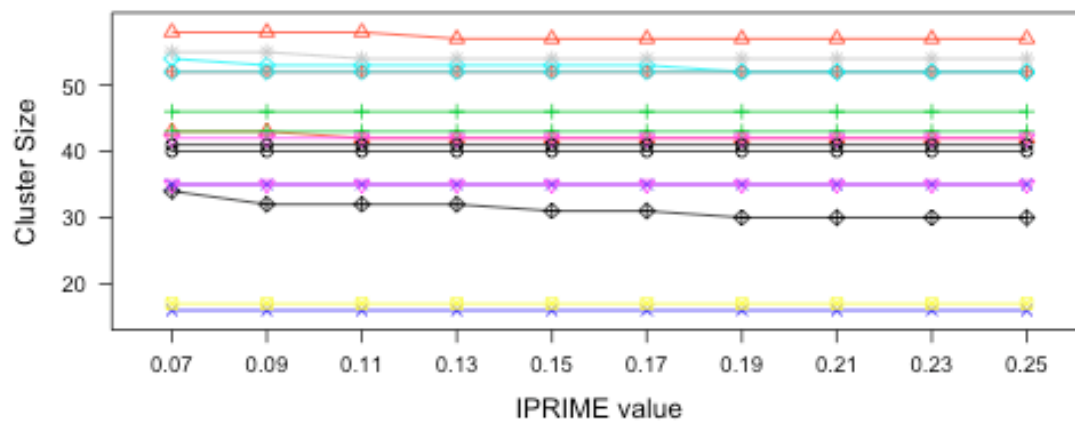

Figure S4. TFCat annotation workflow

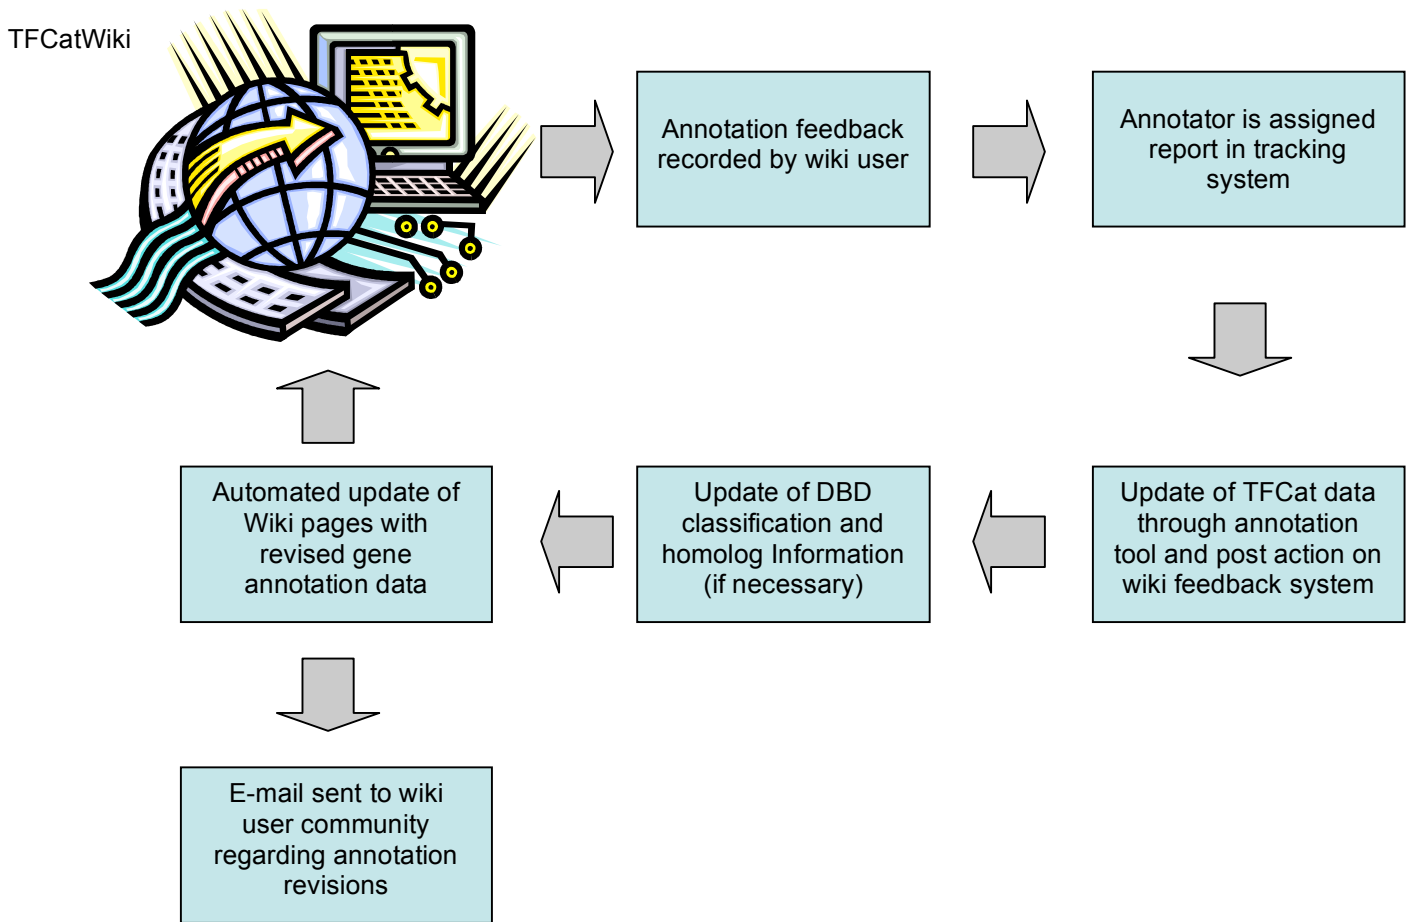

**Figure S5.** Screen shots of the backend web-based TFCat Annotation Tool. Panel A: Each reviewer has password-protected access to a full or partial list of genes assigned to their annotation queue. Panel B: One or more genes may be selected for annotation review/update. Panel C: The gene annotation page facilitates recording of PubMed article reviews and entry of functional taxa and TF judgment assignments. The tool also provides direct access to additional web-based gene information and literature resources to facilitate the curation.

A.



### Select List Options

Selection Parameters

**Reviewer**    
**Species**    
**Judgement Status**    
**Entrez Gene ID**  [Open NCBI Entrez Gene Window](#)

Sort Parameters

\*Enter sort order #s

**Gene ID**     
**Description**     
**Gene Symbol**     
**Last Update**

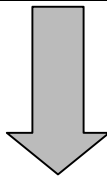

B.



### TF List Maintenance

| Action                                | Gene ID | Gene Name | Description                                                                                       | WIKI URL                                                                                                                              |
|---------------------------------------|---------|-----------|---------------------------------------------------------------------------------------------------|---------------------------------------------------------------------------------------------------------------------------------------|
| <input type="button" value="Update"/> | 83796   | Smarcd2   | SWI/SNF related, matrix associated, actin dependent regulator of chromatin, subfamily d, member 2 | <a href="http://sonoma.cmmt.ubc.ca/TFCatWiki/index.php/Smarcd2_83796">http://sonoma.cmmt.ubc.ca/TFCatWiki/index.php/Smarcd2_83796</a> |
| <input type="button" value="Update"/> | 30927   | Snai3     | snail homolog 3 (Drosophila)                                                                      | <a href="http://sonoma.cmmt.ubc.ca/TFCatWiki/index.php/Snai3_30927">http://sonoma.cmmt.ubc.ca/TFCatWiki/index.php/Snai3_30927</a>     |
| <input type="button" value="Update"/> | 20639   | Snrpb2    | U2 small nuclear ribonucleoprotein B                                                              | <a href="http://sonoma.cmmt.ubc.ca/TFCatWiki/index.php/Snrpb2_20639">http://sonoma.cmmt.ubc.ca/TFCatWiki/index.php/Snrpb2_20639</a>   |
| <input type="button" value="Update"/> | 20665   | Sox10     | SRY-box containing gene 10                                                                        | <a href="http://sonoma.cmmt.ubc.ca/TFCatWiki/index.php/Sox10_20665">http://sonoma.cmmt.ubc.ca/TFCatWiki/index.php/Sox10_20665</a>     |
| <input type="button" value="Update"/> | 20674   | Sox2      | SRY-box containing gene 2                                                                         | <a href="http://sonoma.cmmt.ubc.ca/TFCatWiki/index.php/Sox2_20674">http://sonoma.cmmt.ubc.ca/TFCatWiki/index.php/Sox2_20674</a>       |
| <input type="button" value="Update"/> | 170574  | Sp7       | trans-acting transcription factor 7                                                               | <a href="http://sonoma.cmmt.ubc.ca/TFCatWiki/index.php/Sp7_170574">http://sonoma.cmmt.ubc.ca/TFCatWiki/index.php/Sp7_170574</a>       |
| <input type="button" value="Update"/> | 20728   | Spic      | Spi-C transcription factor (Spi-1/PU.1 related)                                                   | <a href="http://sonoma.cmmt.ubc.ca/TFCatWiki/index.php/Spic_20728">http://sonoma.cmmt.ubc.ca/TFCatWiki/index.php/Spic_20728</a>       |
| <input type="button" value="Update"/> | 20833   | Ssrp1     | structure specific recognition protein 1                                                          | <a href="http://sonoma.cmmt.ubc.ca/TFCatWiki/index.php/Ssrp1_20833">http://sonoma.cmmt.ubc.ca/TFCatWiki/index.php/Ssrp1_20833</a>     |
| <input type="button" value="Update"/> | 20024   | Sub1      | SUB1 homolog (S. cerevisiae)                                                                      | <a href="http://sonoma.cmmt.ubc.ca/TFCatWiki/index.php/Sub1_20024">http://sonoma.cmmt.ubc.ca/TFCatWiki/index.php/Sub1_20024</a>       |
| <input type="button" value="Update"/> | 20937   | Suv39h1   | suppressor of variegation 3-9 homolog 1 (Drosophila)                                              | <a href="http://sonoma.cmmt.ubc.ca/TFCatWiki/index.php/Suv39h1_20937">http://sonoma.cmmt.ubc.ca/TFCatWiki/index.php/Suv39h1_20937</a> |
| <input type="button" value="Update"/> | 21339   | Taf1a     | TATA box binding protein (Tbp)-associated factor, RNA polymerase I, A                             | <a href="http://sonoma.cmmt.ubc.ca/TFCatWiki/index.php/Taf1a_21339">http://sonoma.cmmt.ubc.ca/TFCatWiki/index.php/Taf1a_21339</a>     |
| <input type="button" value="Update"/> | 21380   | Tbx1      | T-box 1                                                                                           | <a href="http://sonoma.cmmt.ubc.ca/TFCatWiki/index.php/Tbx1_21380">http://sonoma.cmmt.ubc.ca/TFCatWiki/index.php/Tbx1_21380</a>       |

[Prev](#) [7](#) [8](#) [Next](#)

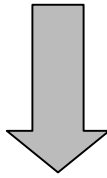

C.

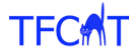

## Maintain Gene Assessment Information

[Update Gene Entry](#)
[Go To Selected TF List](#)
[Open Reviewer Guidelines/Help Window](#)

### TF Gene Candidate Information

**Gene ID:** 20674
 [Open NCBI Entrez Gene Window](#)
[Open IHOP Window](#)
[Open SWISSPROT Window](#)

**Description:** Sox2 SRY-box containing gene 2

**Gene Aliases:** lcc; Sox-2; ysb;

### GeneRIF Information

#### PubMed IDs

| PubMed IDs                    | GeneRIF                                                                                                                                                                                                                                    |
|-------------------------------|--------------------------------------------------------------------------------------------------------------------------------------------------------------------------------------------------------------------------------------------|
| <a href="#">View</a> 12167158 | role in regulating lens-specific delta1-crystallin enhancer                                                                                                                                                                                |
| <a href="#">View</a> 12923055 | Sox2 can dimerize onto DNA in a distinct conformational arrangement.                                                                                                                                                                       |
| <a href="#">View</a> 15113840 | newly identified enhancer with Sox elements activates the alphaB-crystallin promoter in the lens, although they are separated by the entire HSPB2 gene                                                                                     |
| <a href="#">View</a> 15121842 | Sox-2 regulatory region 2 is the first example of an enhancer in which a single regulatory core sequence is involved in multipotent-state-specific expression in two different stem cells                                                  |
| <a href="#">View</a> 15240551 | These findings highlight a crucial and unexpected role for Sox2 in the maintenance of neurones in selected brain areas.                                                                                                                    |
| <a href="#">View</a> 15262984 | findings indicate a role for the same POU binding motifs in Sox2 transgene regulation in both ES and neural precursor cells                                                                                                                |
| <a href="#">View</a> 15557334 | results indicate that Oct-3/4 is a member of the gene family regulated by Oct-3/4 and Sox2                                                                                                                                                 |
| <a href="#">View</a> 15695336 | One of the abnormally elevated genes in Egr2Lo/Lo Schwann cells, Sox2, encodes a transcription factor that is crucial for maintenance of neural stem cell pluripotency.                                                                    |
| <a href="#">View</a> 15711057 | These studies demonstrate that SOX2 may meet the requirements of a universal neural stem cell marker and provides a means to identify cells which fulfill the basic criteria of a stem cell: self-renewal and multipotent differentiation. |
| <a href="#">View</a> 15846349 | absence or reduced expression of the transcription factor SOX2 within the developing inner ear, results in inner ear malformation                                                                                                          |
| <a href="#">View</a> 15860457 | nanog is transcriptionally regulated by OCT4 and SOX2                                                                                                                                                                                      |
| <a href="#">View</a> 15863505 | Sox15 and Sox2 have distinct roles in transcriptional control in mouse ES cells                                                                                                                                                            |
| <a href="#">View</a> 16026334 | Expression of Sox2 is a unifying characteristic of neural stem cells in the adult rat brain, but that not all NSCs maintain the ability to form all neural cell types in vivo.                                                             |

### PubMed Evidence

| PubMed IDs                        | Function                      | Species       | Evidence Strength | Comments                                                                                                                                                                                                                                                                                                                                                                                               |
|-----------------------------------|-------------------------------|---------------|-------------------|--------------------------------------------------------------------------------------------------------------------------------------------------------------------------------------------------------------------------------------------------------------------------------------------------------------------------------------------------------------------------------------------------------|
| <a href="#">Maintain</a> 15860457 | DNA Binding; Transactivation; | Human; Mouse; | Strong            | <p>Mutations affecting the Oct and Sox elements in the Nanog promoter reduced the activity of a luciferase reporter gene.</p> <p>Oct4 and Sox2 bind to the Nanog promoter by ChIP experiments and supershift EMSA assays.</p> <p>Knockdown of Oct4 or Sox2 with RNAi reduces Nanog promoter-luciferase reporter gene activity.</p> <p>Title: Transcriptional regulation of nanog by OCT4 and SOX2.</p> |

[Add PubMed Information](#)

### Reviewer's Assessment

**Reviewer's Judgement** Previously Selected Judgement: TF Gene

TF Gene

#### Taxonomy

Previously Selected Taxa: DNA-Binding: sequence-specific;

Transcription Regulatory Activity: heterochromatin interaction/binding  
 DNA-Binding: sequence-specific  
 DNA-Binding: non-sequence-specific  
 Single stranded RNA/DNA binding  
 Transcription Factor Binding: tf co-factor binding  
 Basal Transcription Factor

Sox2 is a transcription factor. It binds DNA by ChIP and supershift EMSA assays and is required for Nanog promoter activity by luciferase reporter gene and RNAi assays.

#### Reviewer Comments

#### TFCatWiki URL

[http://sonoma.cmmt.ubc.ca/TFCatWiki/index.php/Sox2\\_20674](http://sonoma.cmmt.ubc.ca/TFCatWiki/index.php/Sox2_20674)

[Open TFCatWiki Window](#)

[Update Gene Entry](#)
[Go To Selected TF List](#)
[Exit Application](#)
[Open Reviewer Guidelines/Help Window](#)



**Figure S6.** Final cluster membership for the Sox containing test set genes. Genes that are members of the test set are colored in yellow. Panel A: Final Sox cluster membership when domain-matching as a primary criteria and  $I'_s$  thresholds applied secondary criteria is applied, in conjunction with an approximation method for merging proportionally linked clusters. Panel B: Example of final Sox containing merged clusters when only the  $I'_s$  threshold method is applied (using an  $I'_s$  value of 0.21)

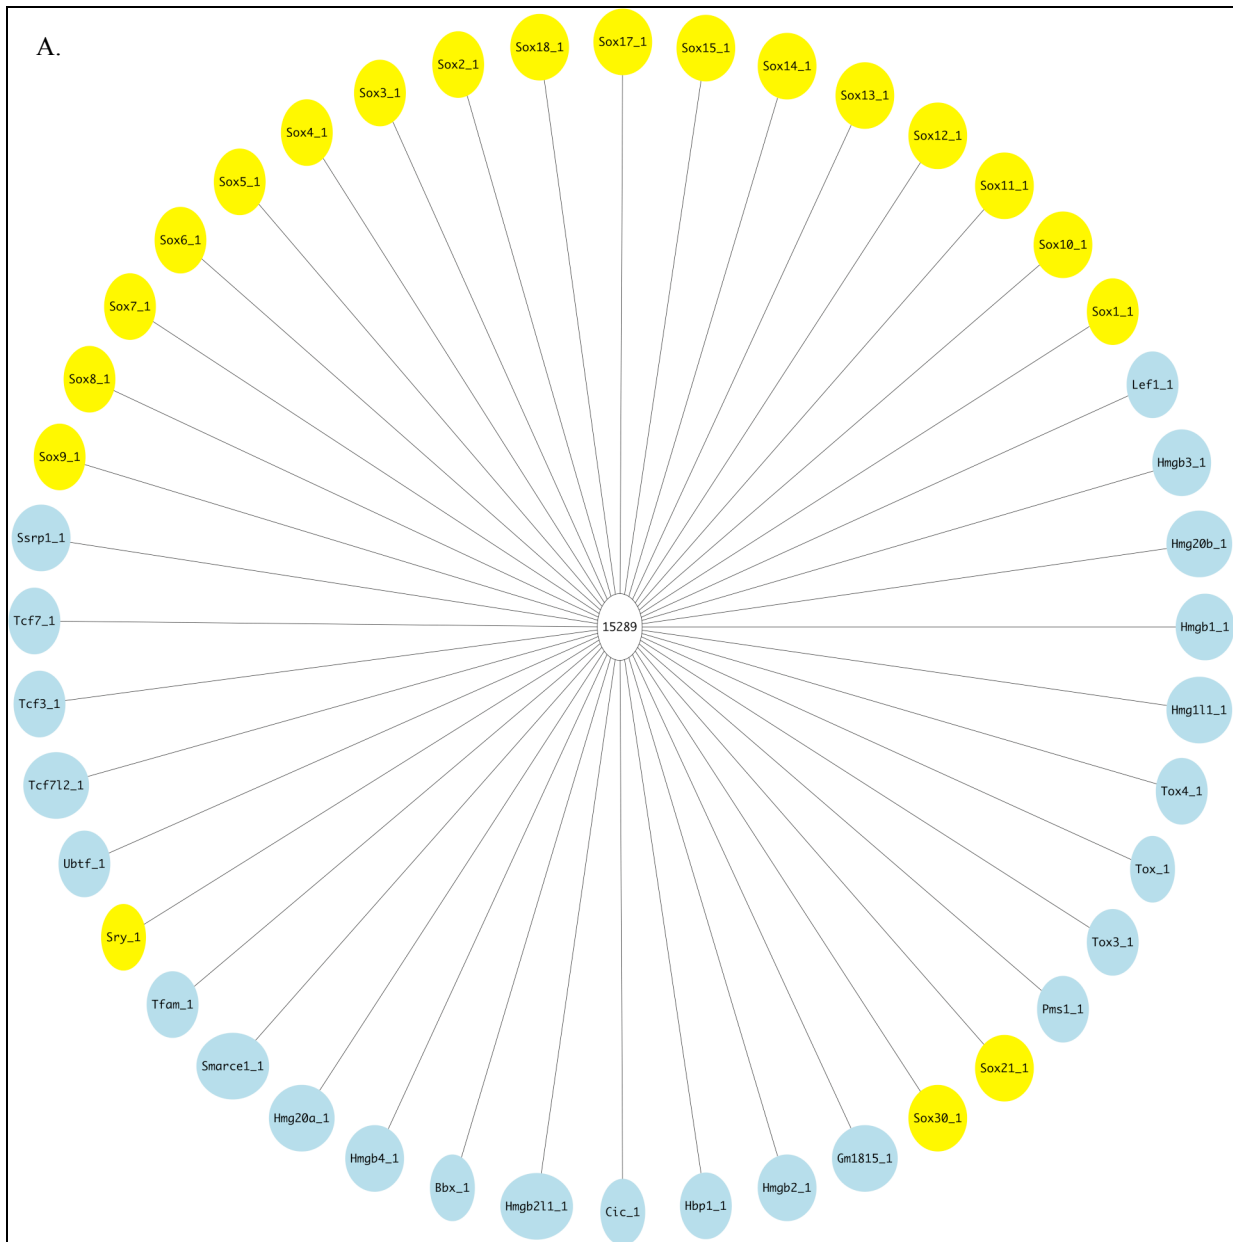

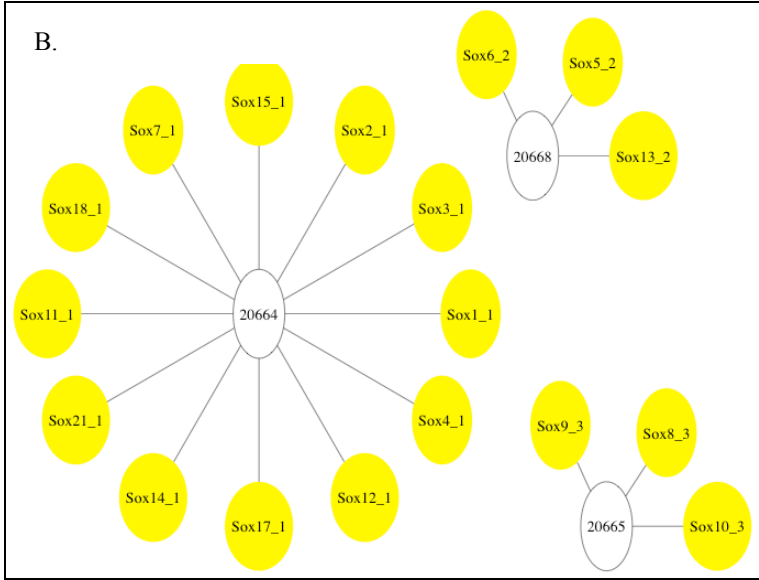

**Figure S7.** Final cluster membership for the Fox containing test set genes. Genes that are members of the test set are colored in yellow. Panel A: Final Fox cluster membership when domain-matching as a primary criteria and  $I'_s$  thresholds applied secondary criteria is applied, in conjunction with an approximation method for merging proportionally linked clusters. Panel B: Example of final Fox merged clusters when only the  $I'_s$  threshold method is applied (using an  $I'_s$  value of 0.21).

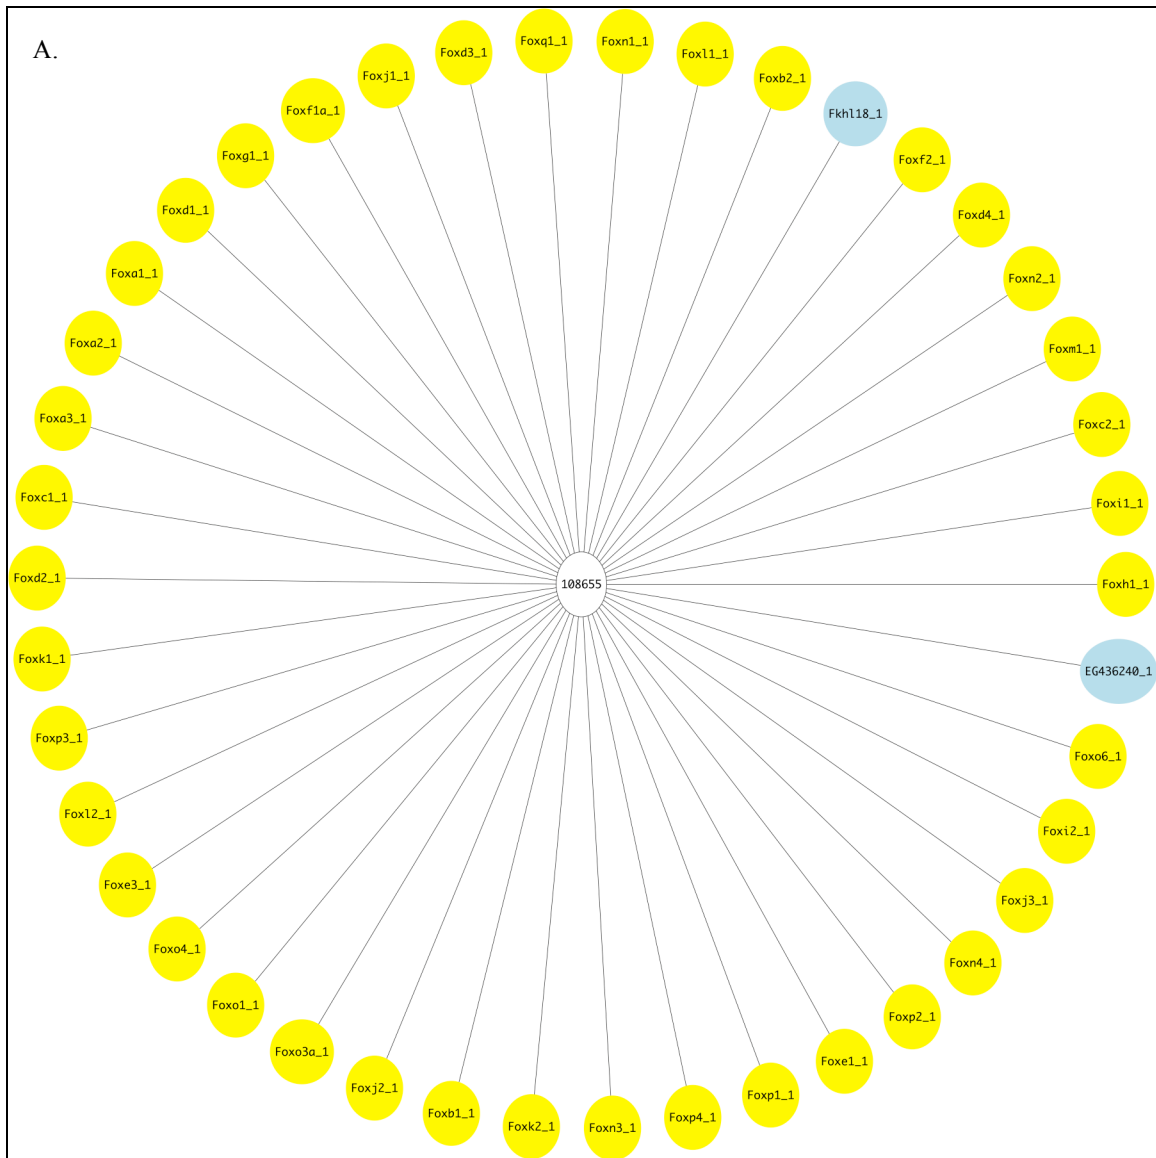

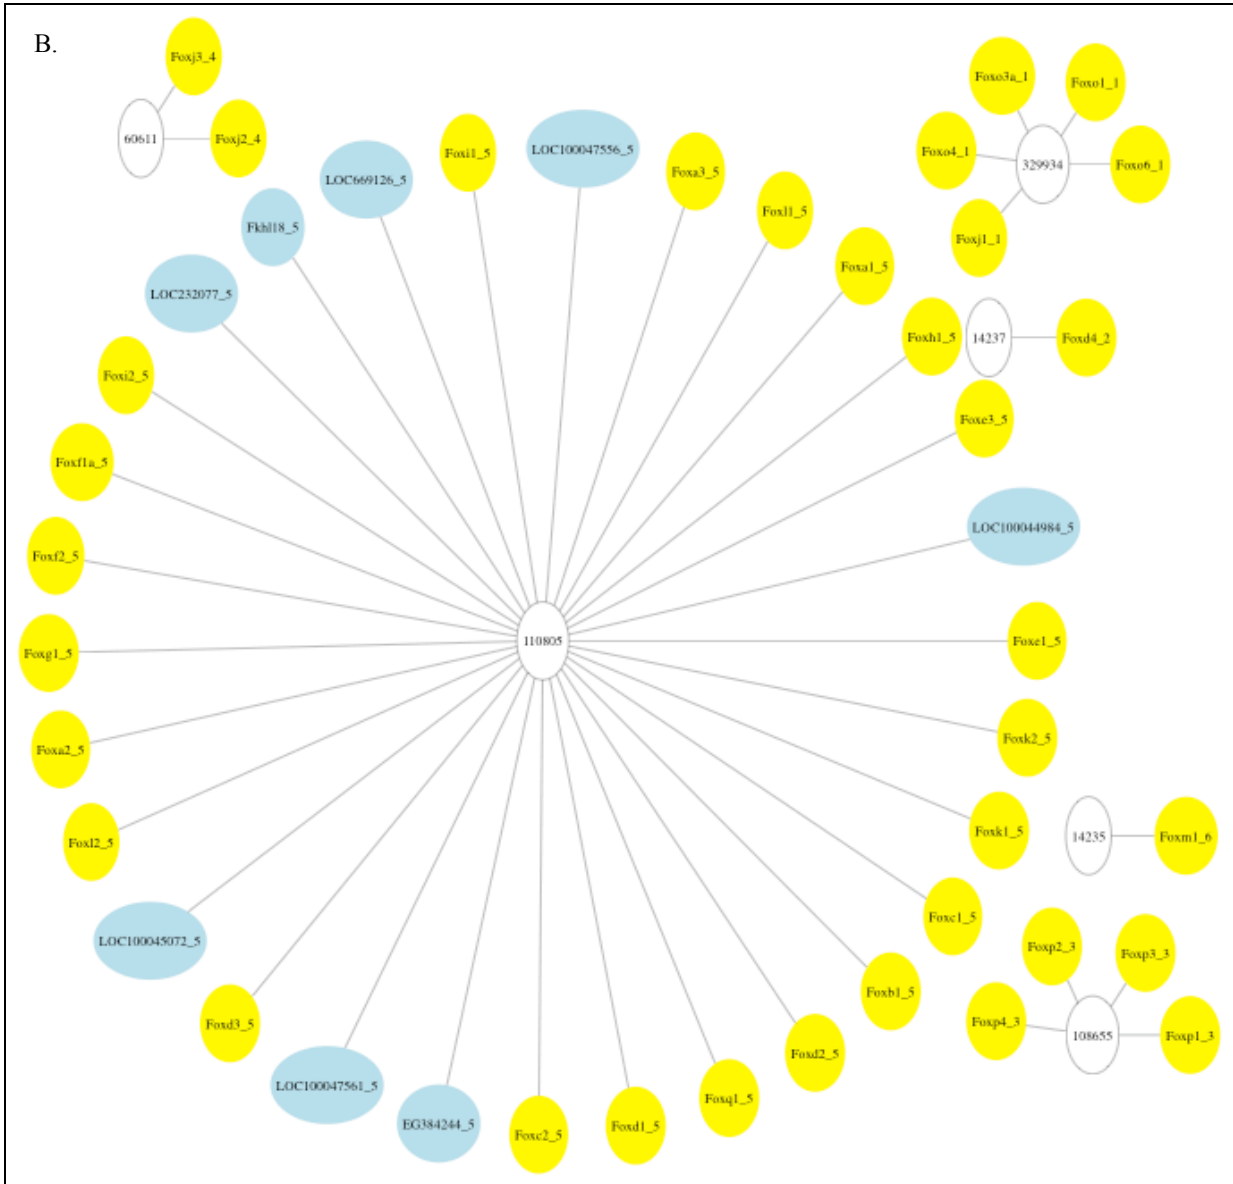

**Figure S8.** Example of pruned Fox-containing clusters generated using the I<sub>s</sub> only method using a threshold of 0.21.

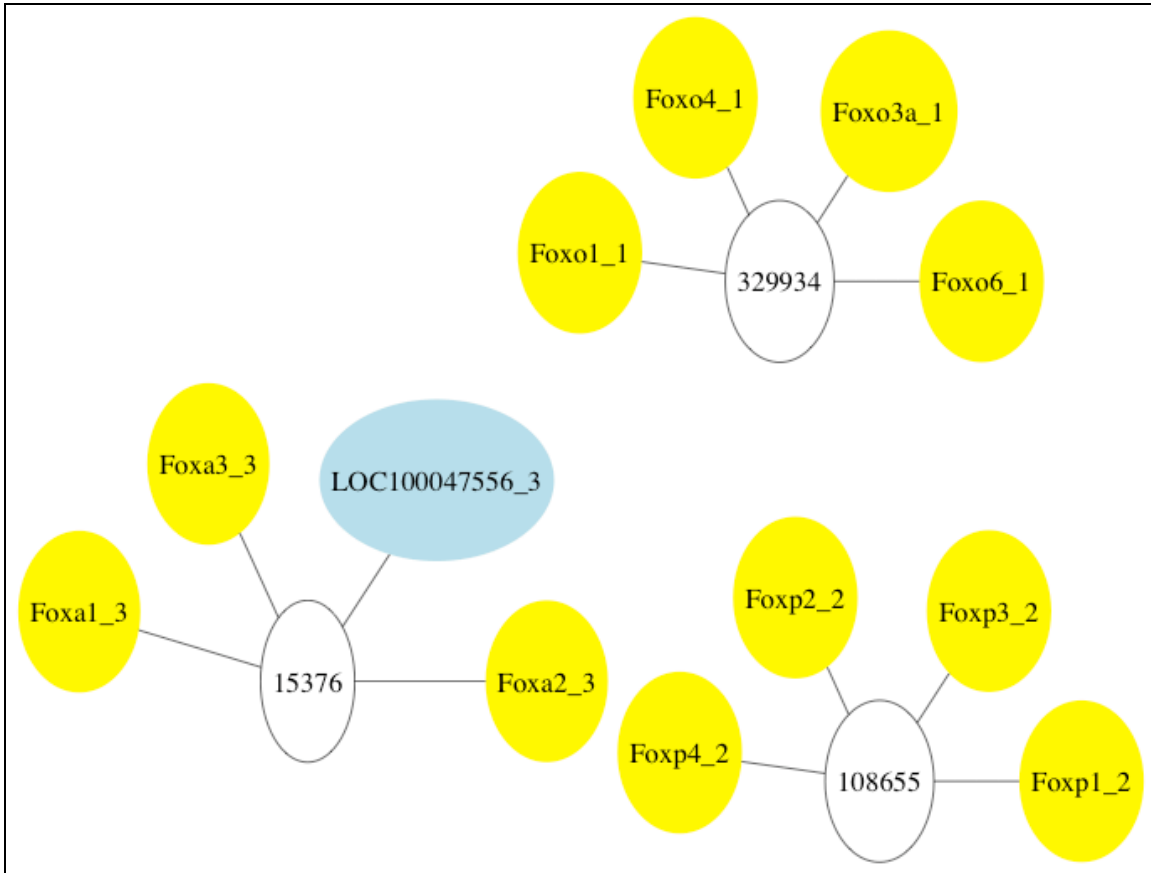

Supplement: gb-2009-10-3-r29-S1.pdf [file gb-2009-10-3-r29-S1.pdf]
